# Supplementary material for: NaA zeolite cubic crystal formation and deformation: cubes with crystalline core, simultaneous growth of surface and core crystals, and layer-by-layer destruction
Source: Royal Society of Chemistry journal article supplement (doi:10.1039/c2ra20567j), 2012-01-01
Supplement: c2ra20567j.pdf [file c2ra20567j.pdf]

## ELECTRONIC SUPPLEMENTARY INFORMATION (ESI)

Contemplation of NaA zeolite cubic crystal formation and deformation:  
Cubes with crystalline core, simultaneous growth of surface and core  
crystals, and layer-by-layer destruction

**Pankaj Sharma,<sup>a,b</sup> Jeong-gu Yeo,<sup>b</sup> Moon Hee Han,<sup>a</sup> and Churl Hee Cho<sup>a\*</sup>**

<sup>a</sup>Graduate School of Green Energy Technology, Chungnam National University, 99  
Daehakro, Yuseong-gu, Daejeon 305-764, Republic of Korea

<sup>b</sup>Energy Materials and Convergence Research Department, Korea Institute of Energy  
Research, 71-2 Jang-dong, Yuseong-gu, Daejeon 305-343, Republic of Korea

\*Corresponding author. Tel.: +82-42-821-8606; fax: +82-42-822-3334; *E-mail address*:

choch@cnu.ac.kr (C. H. Cho)

## SII. Specially designed autoclave

It is a specially designed autoclave with inner volume of 2.1 L, manufactured by UTO Engineering Co. Ltd., South Korea. This autoclave has some special features in comparison to other commonly used autoclaves for zeolite material synthesis. It contains heat profile controller, pressure monitor and also mechanical stirrer with controller, which help in highly desirable homogenous heating and mixing of hydrogel throughout the synthesis process. A gas inlet-outlet is also provided in this autoclave to make desirable changes in synthesis environment by introducing the desired gas. Another exciting feature of this autoclave is that an aliquot can be taken from the precursor mixture at any time without stopping the crystallization reaction and changing the synthesis conditions.

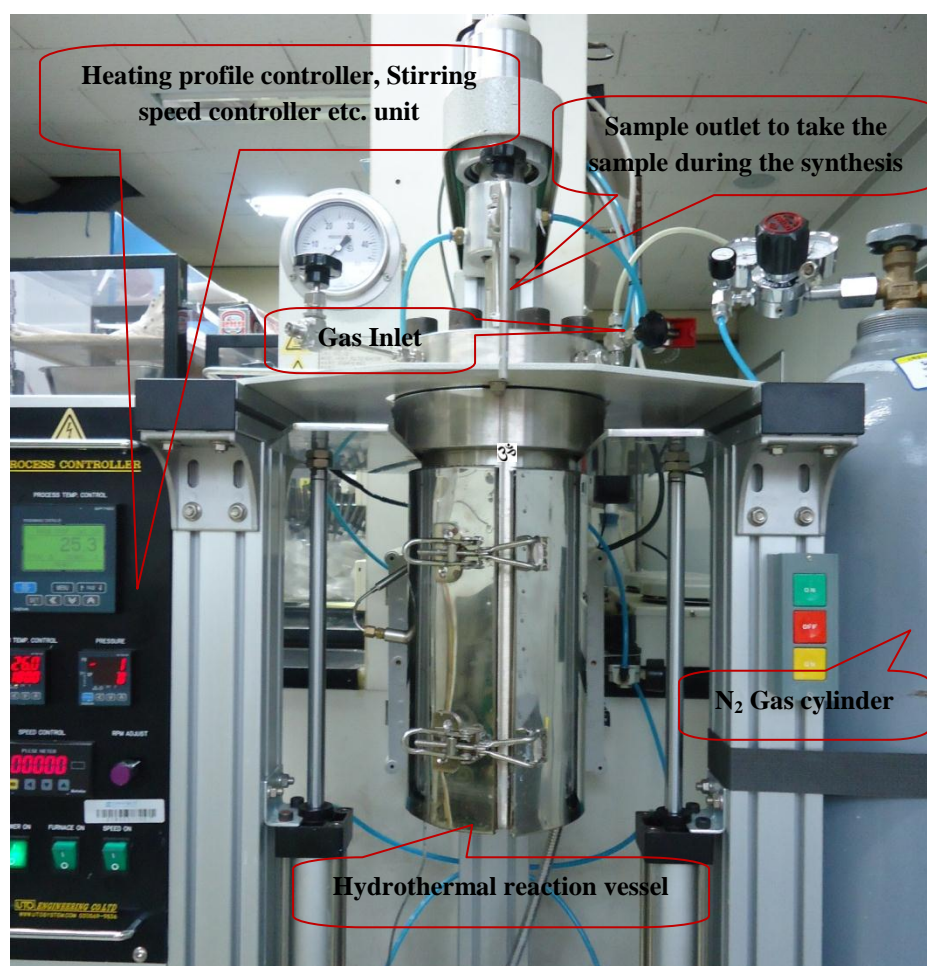

SII. Specially designed autoclave.

## SI2

Heating profile/rate during the crystallization process.

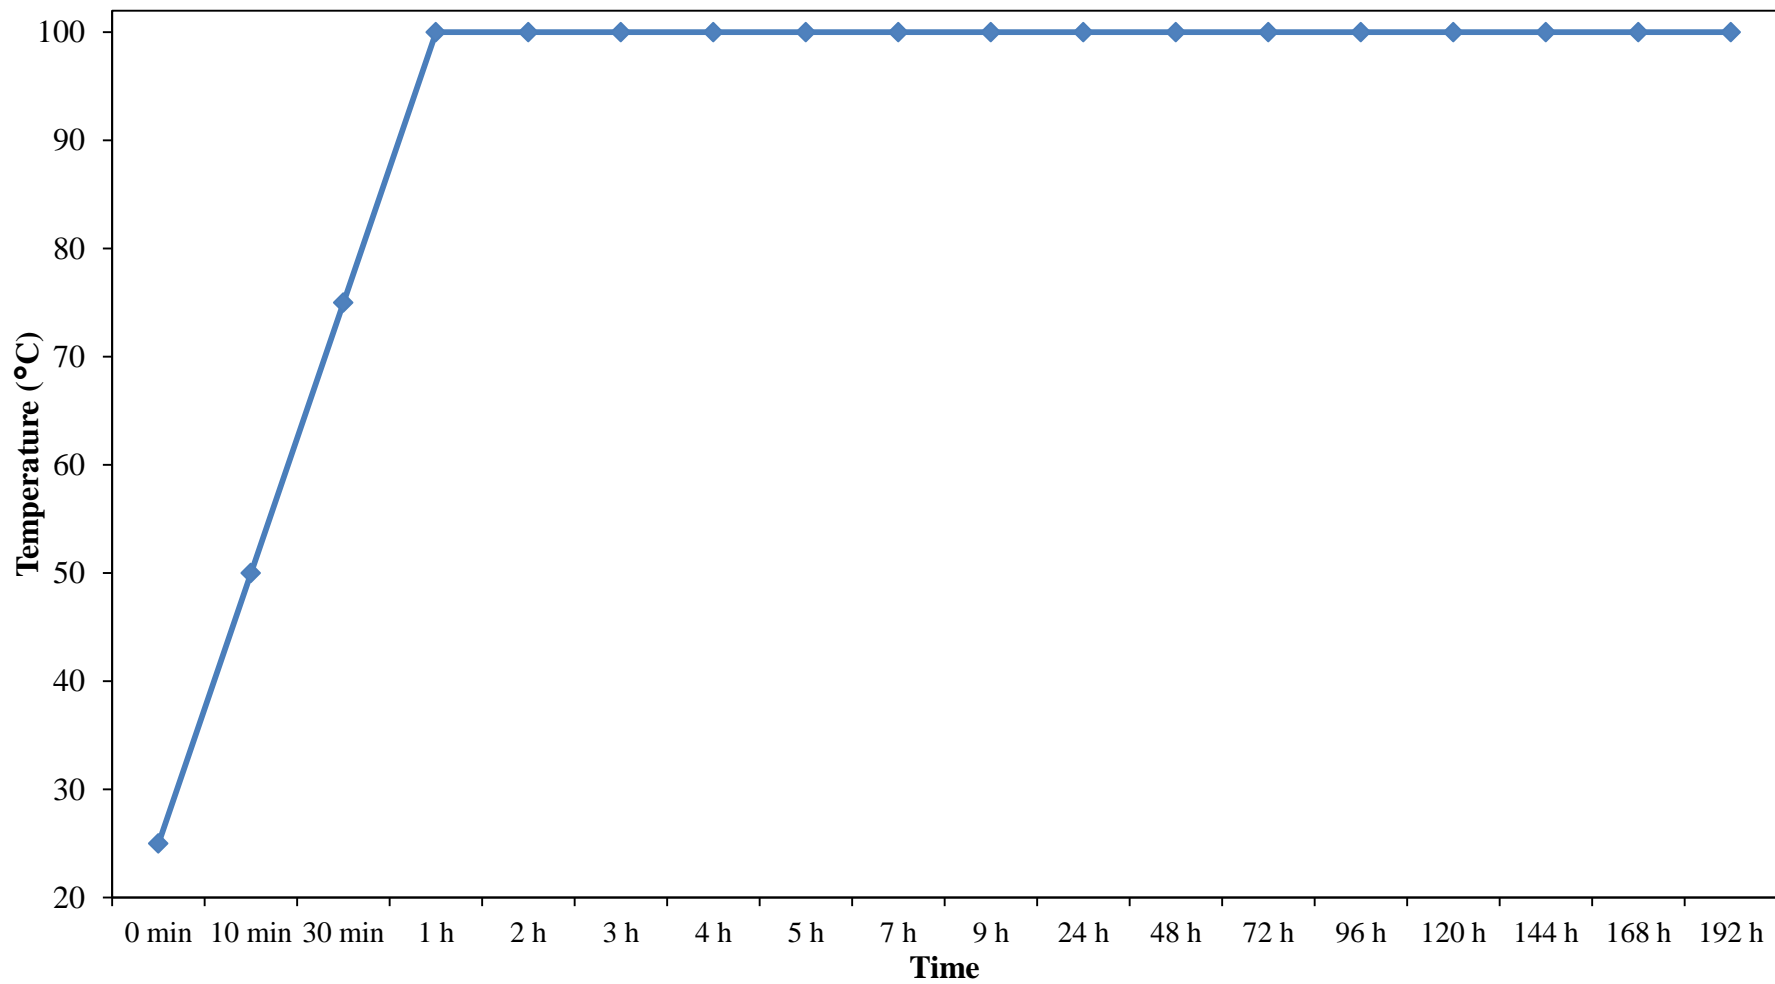

### SI3

Mean particle size corresponding to 1<sup>st</sup> scan, 2<sup>nd</sup> scan, 3<sup>rd</sup> scan, 4<sup>th</sup> scan, 5<sup>th</sup> scan and average of these scans for the NaA zeolite specimens obtained at different crystallization time.

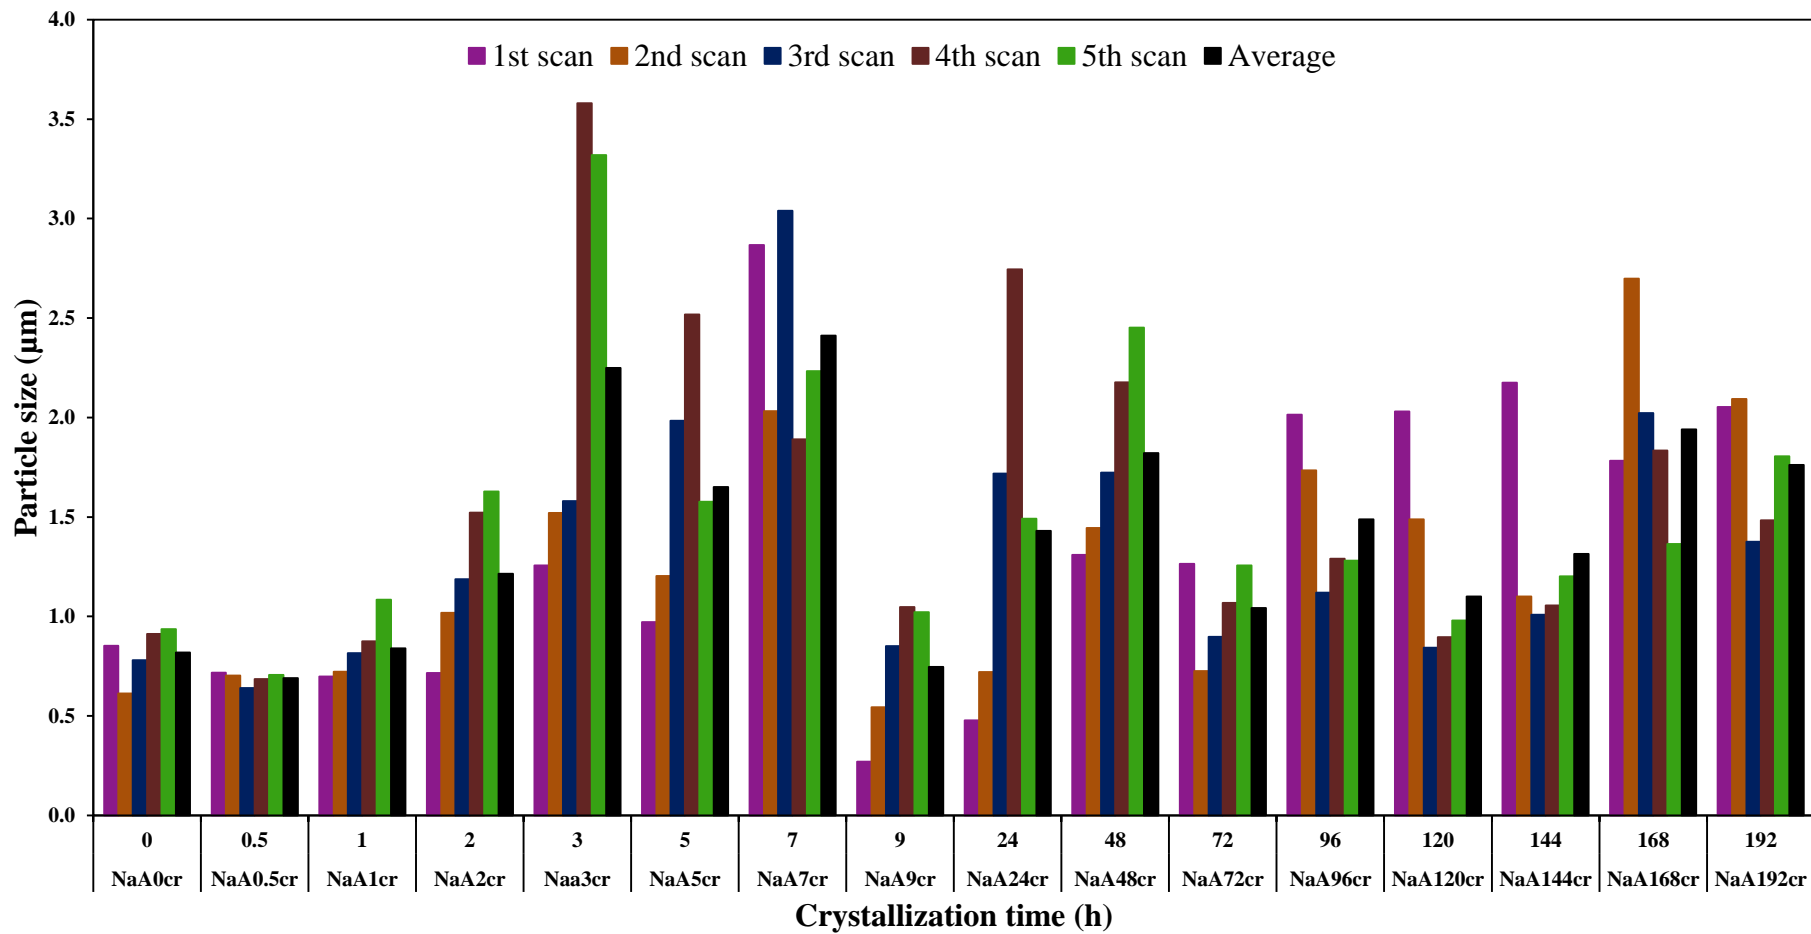

## SI4

% Tile of particle size corresponding to 1<sup>st</sup> scan, 2<sup>nd</sup> scan, 3<sup>rd</sup> scan, 4<sup>th</sup> scan, 5<sup>th</sup> scan and average of these scans for the specimens obtained at different crystallization time.

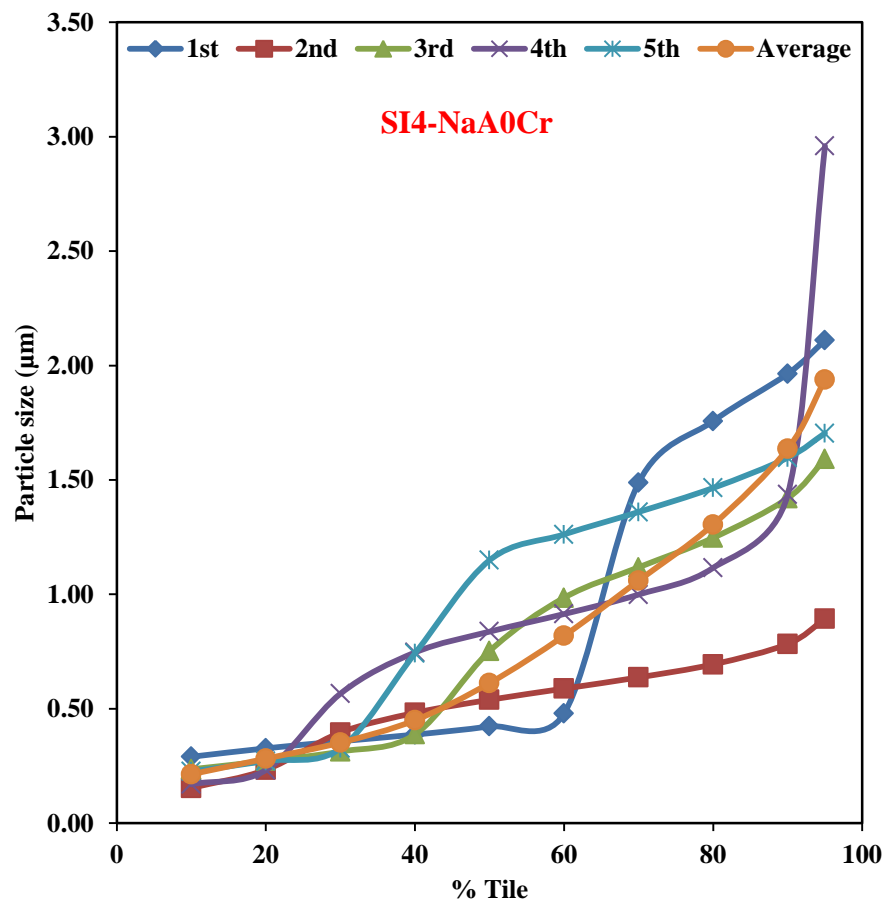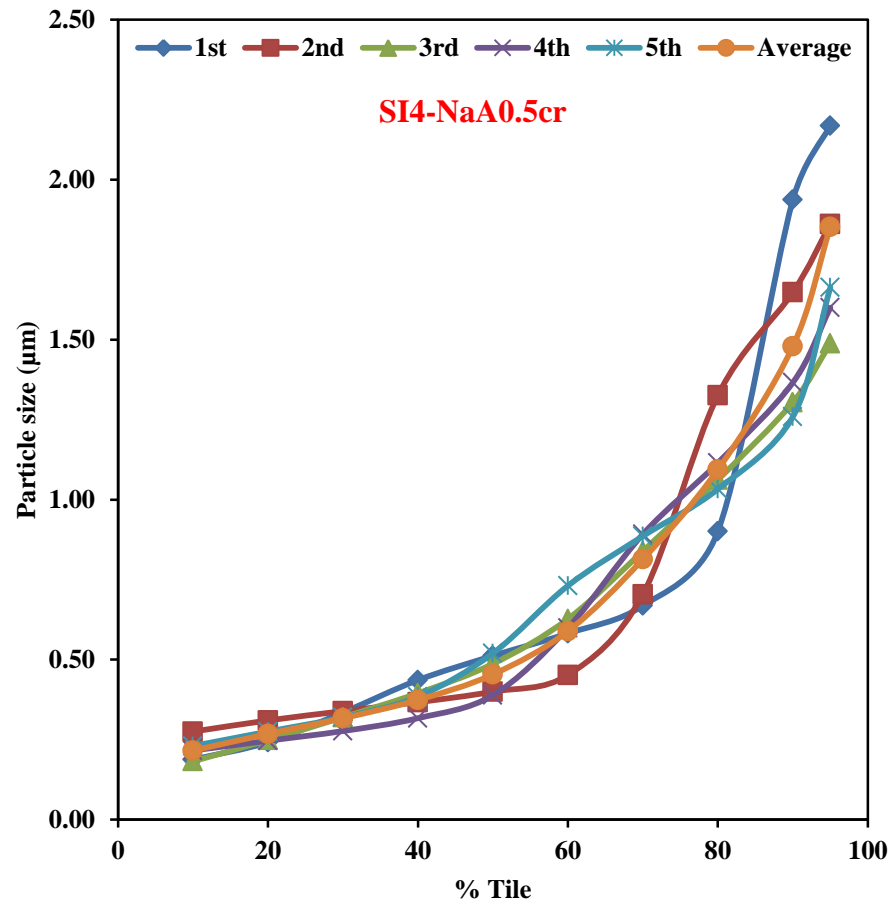

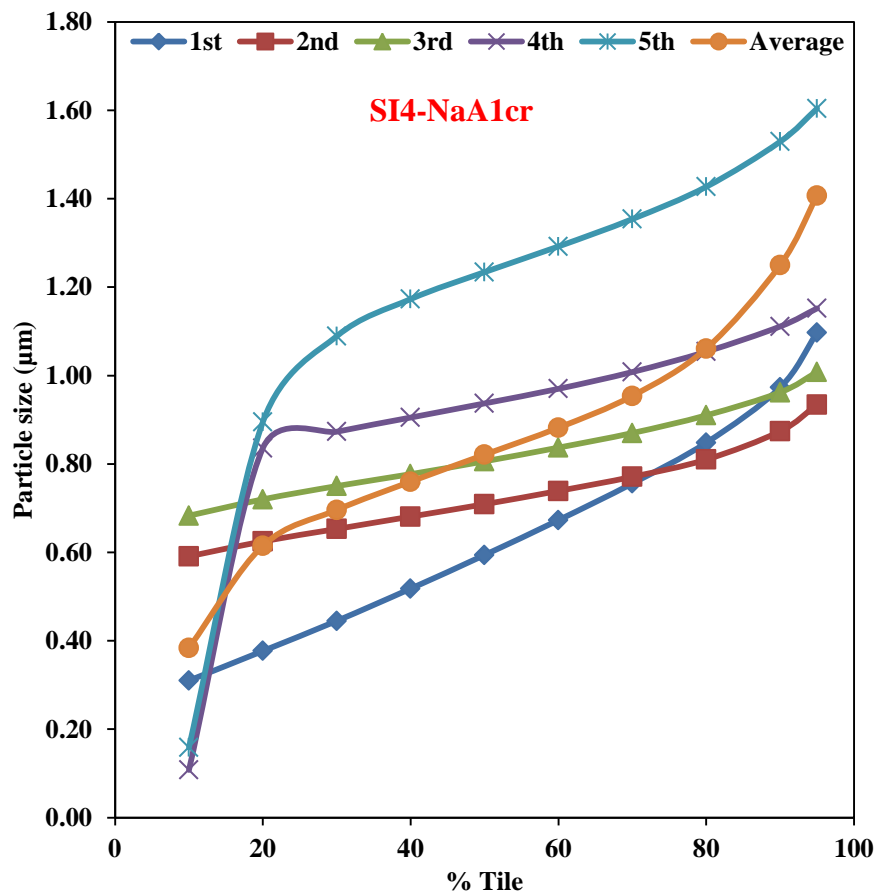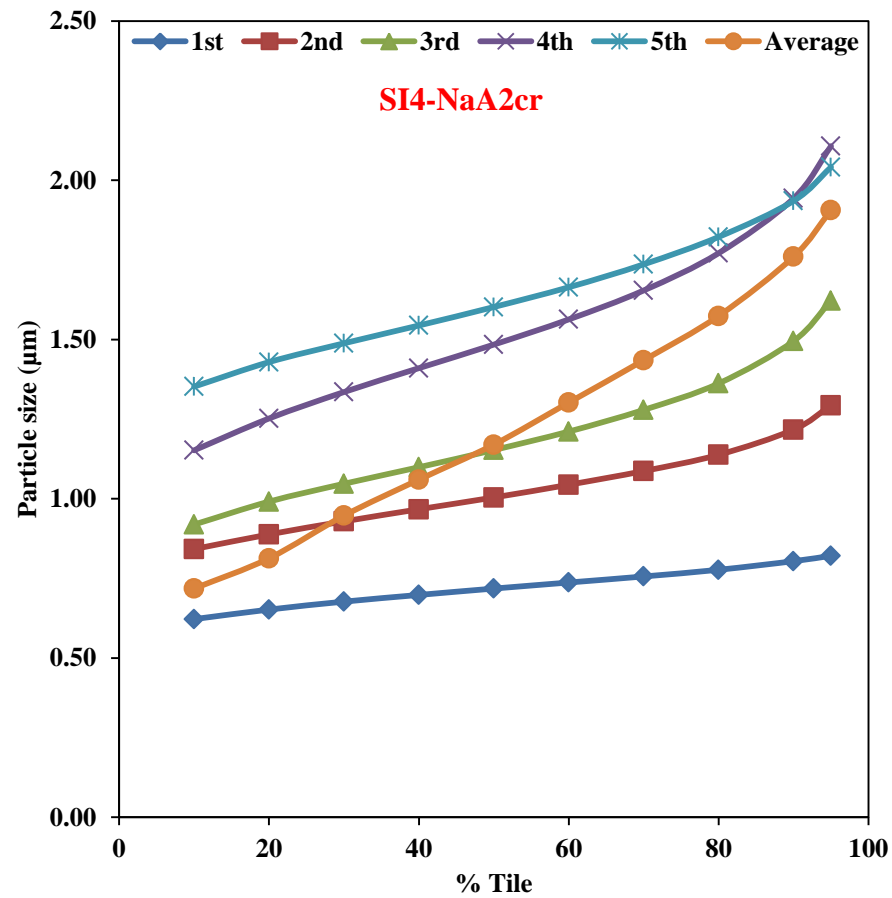

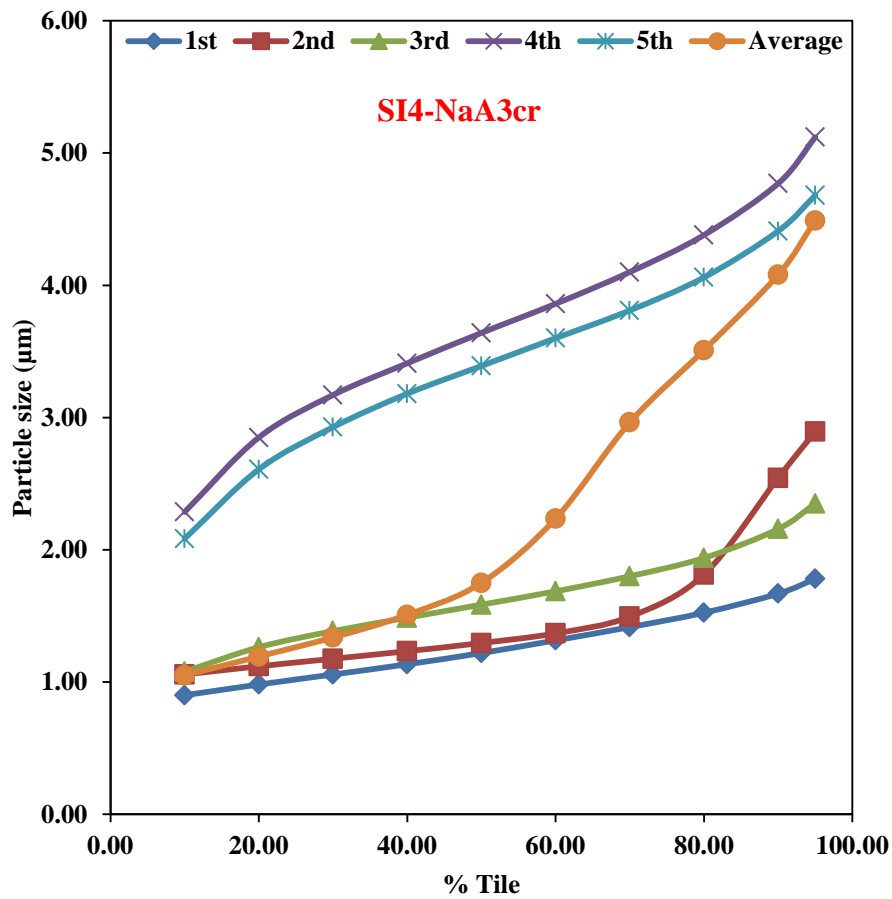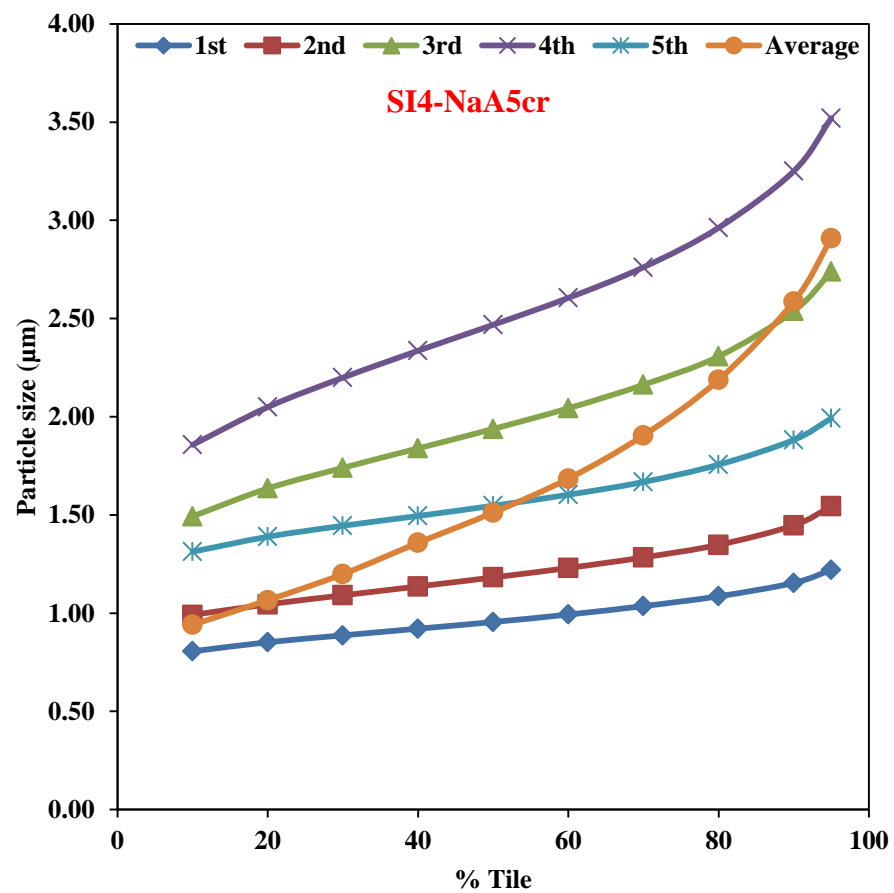

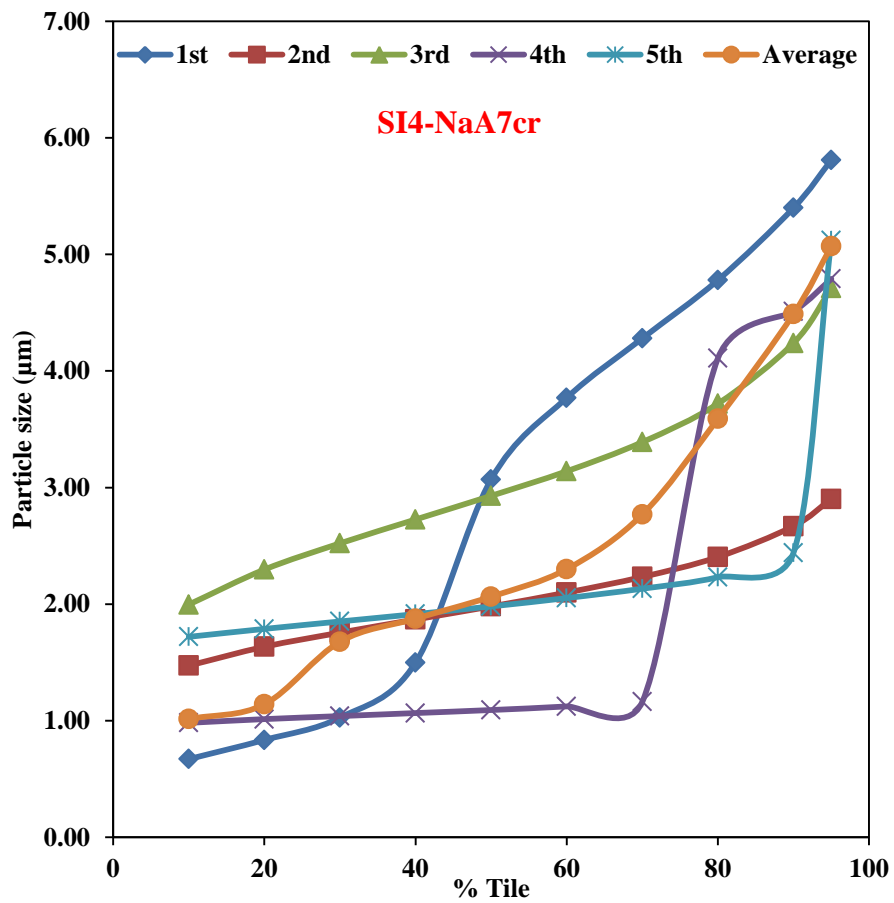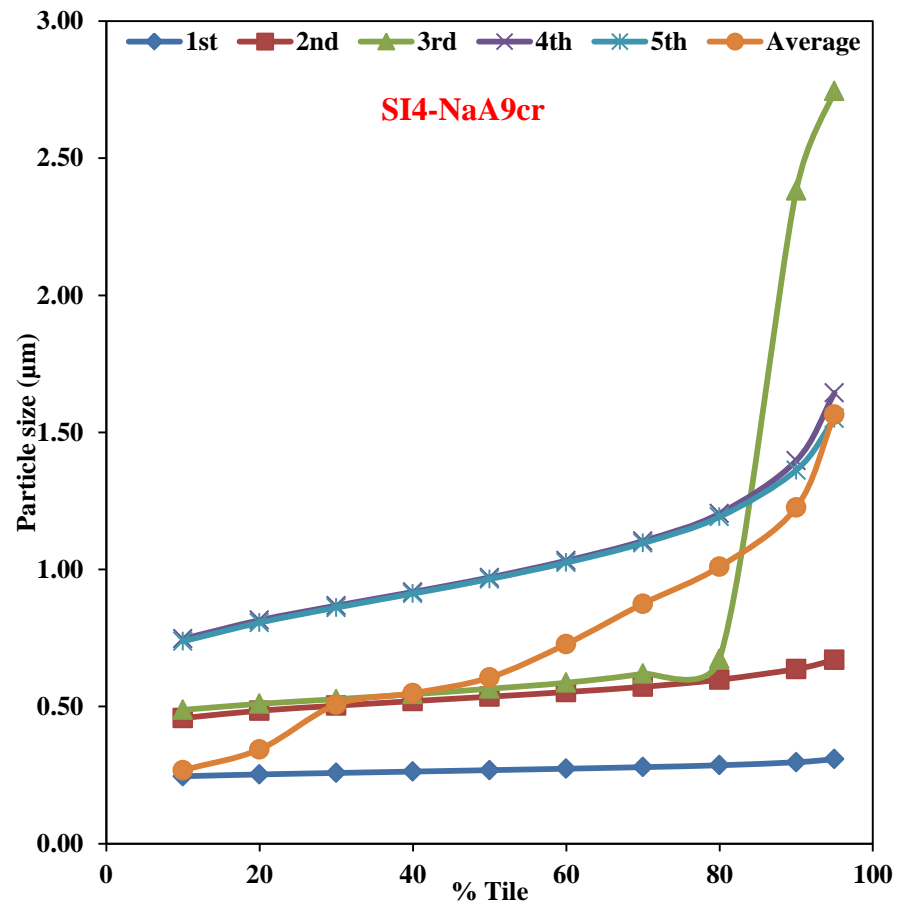



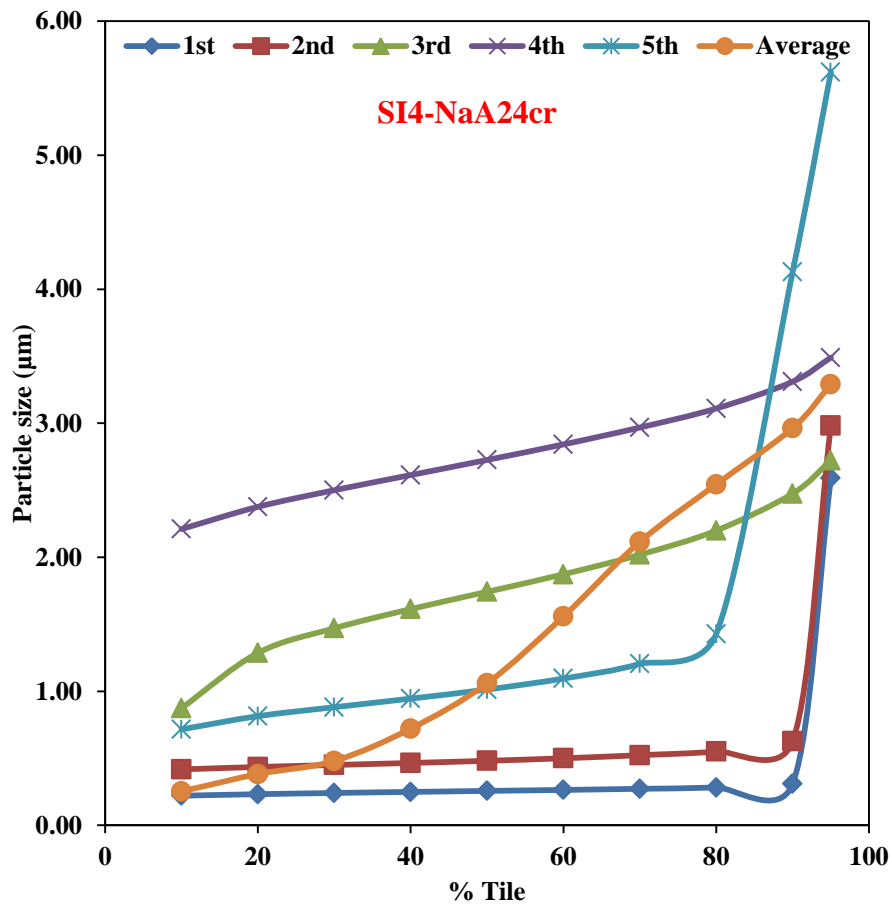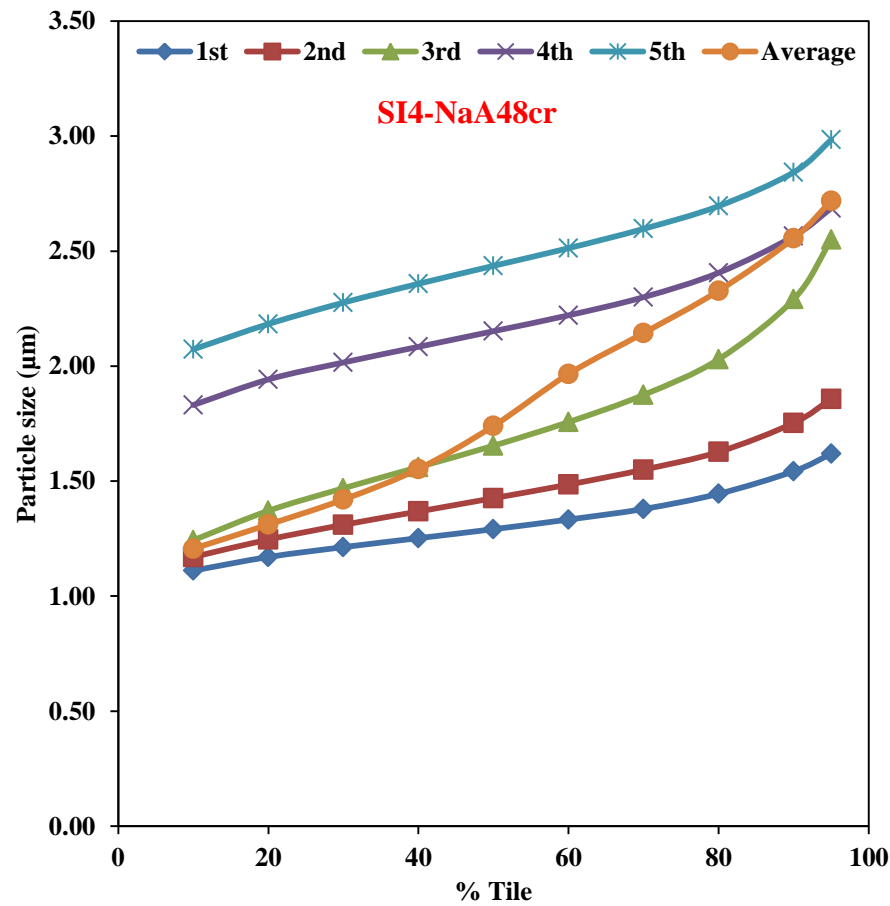

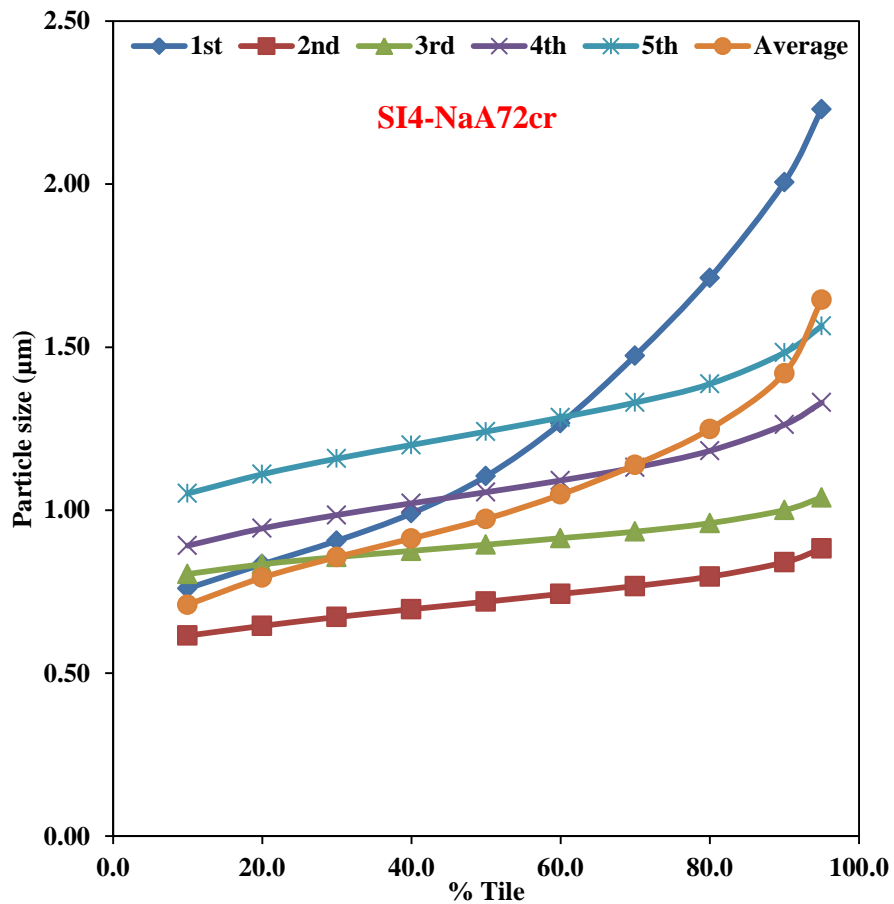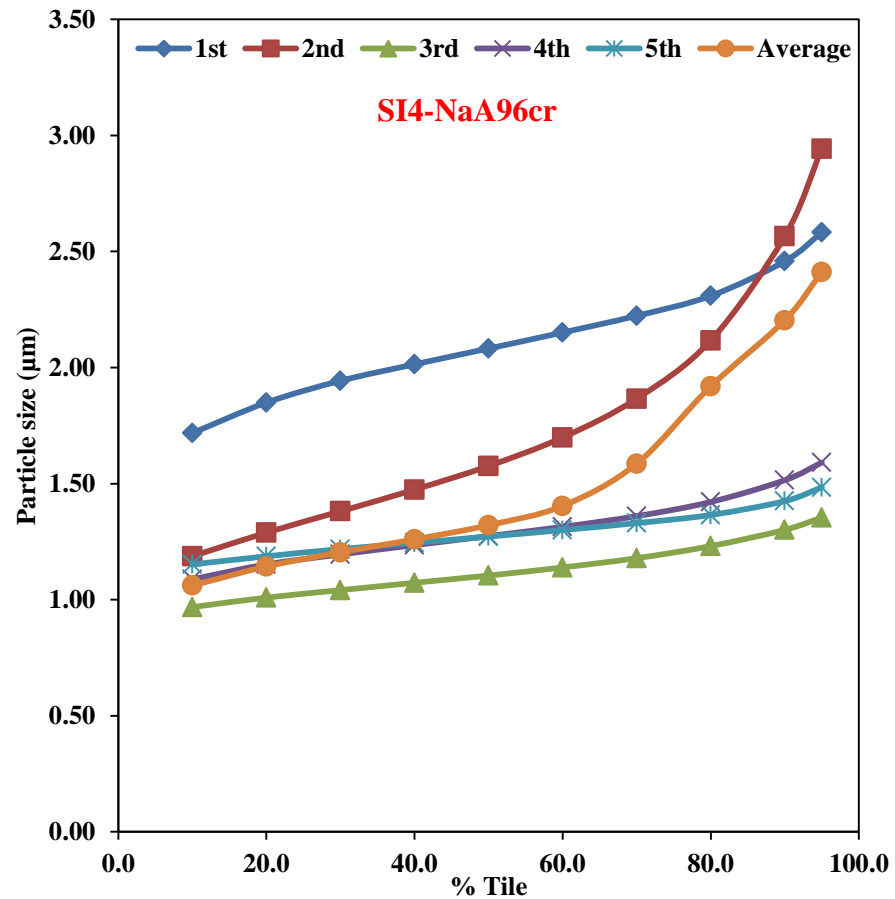

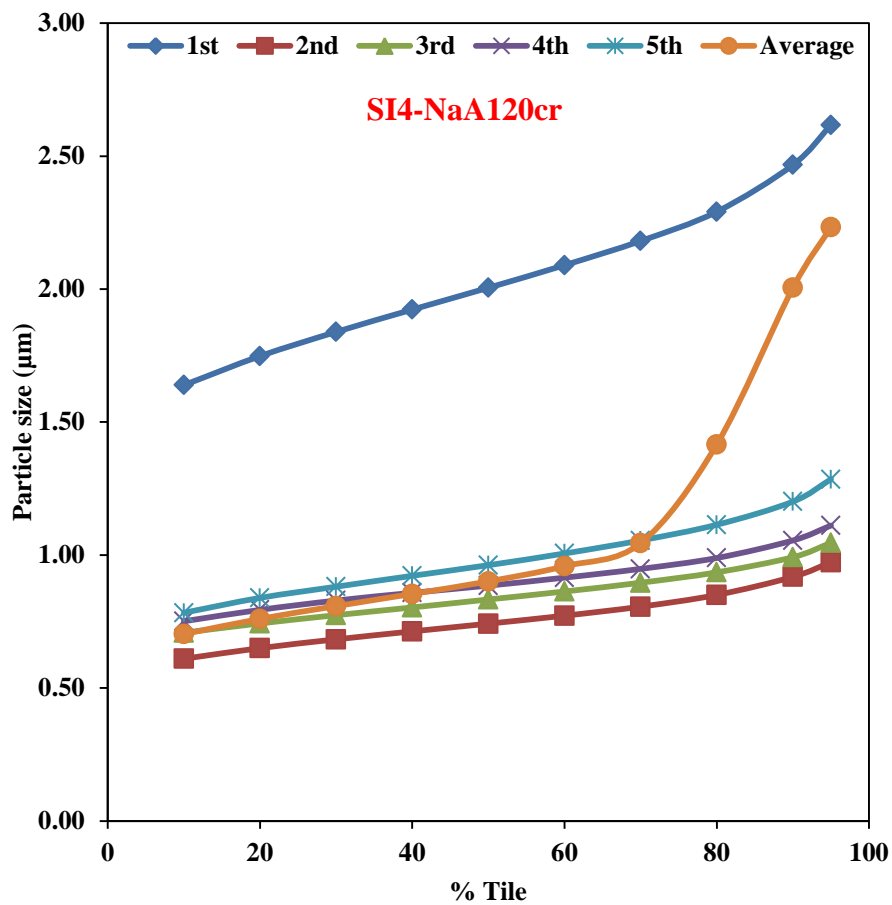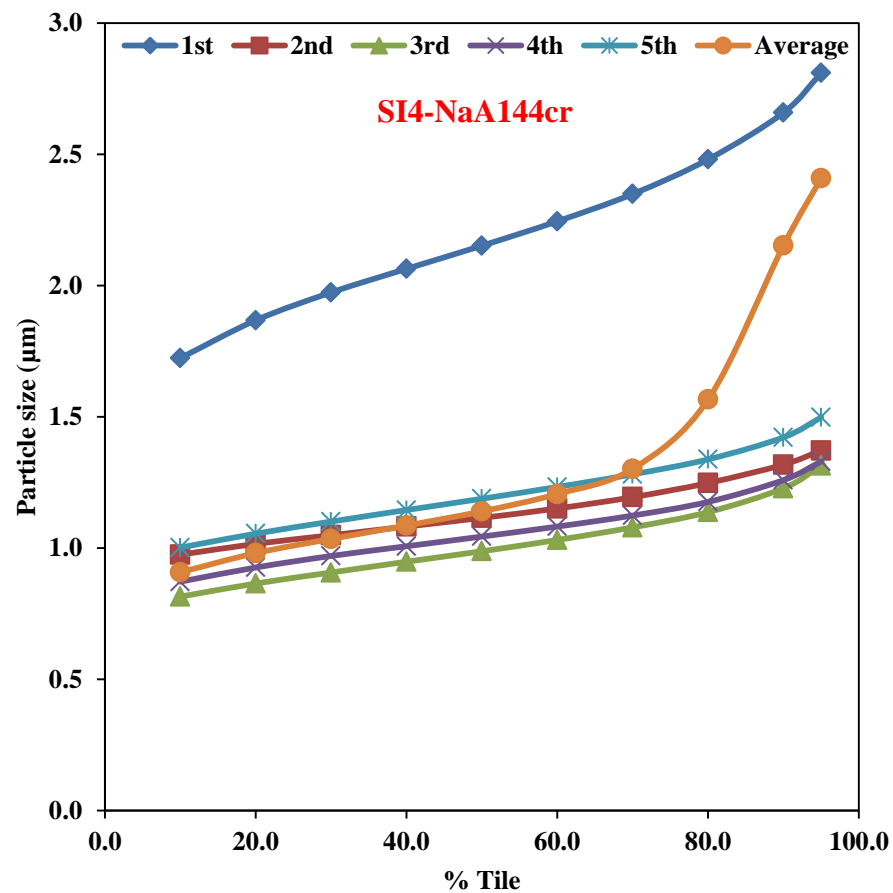

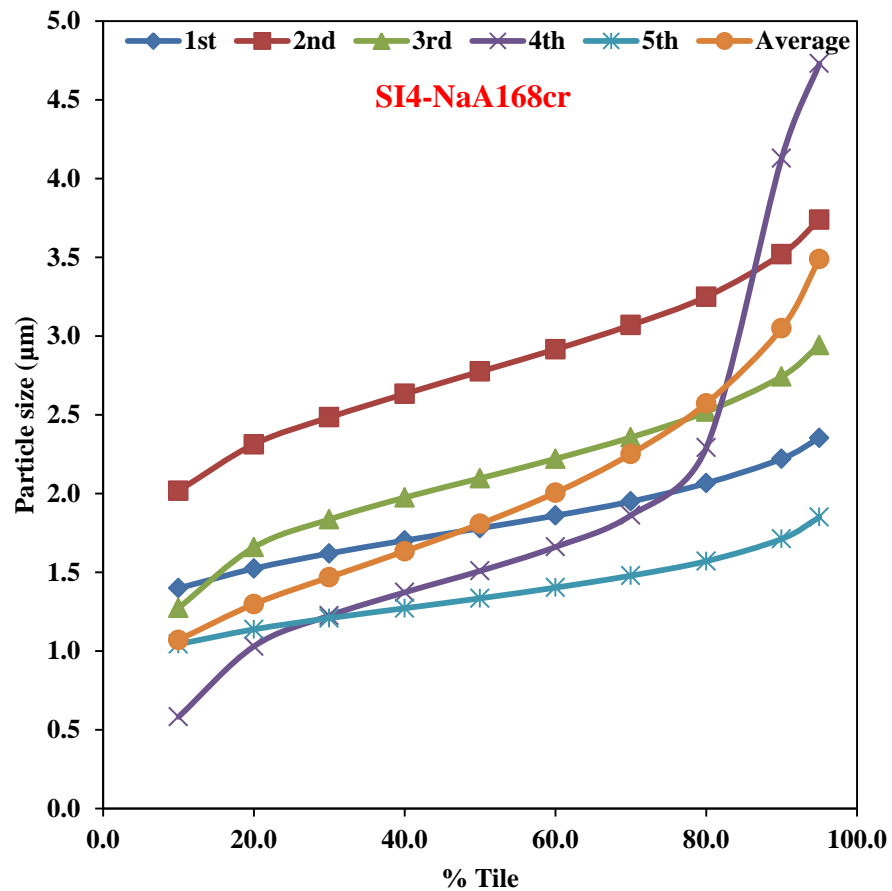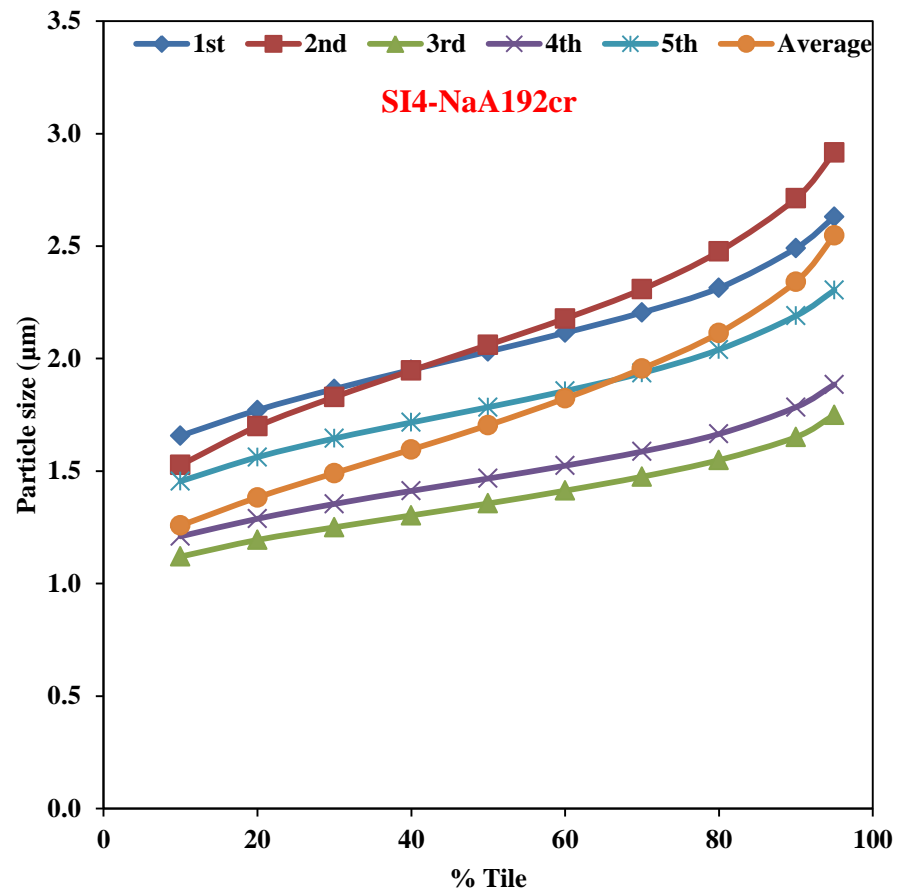

**SI5.** SEM micrographs of the different specimens obtained during the growth process of NaA zeolite crystals at different magnifications. In these micrographs the corresponding specimen code is written on page bottom center.

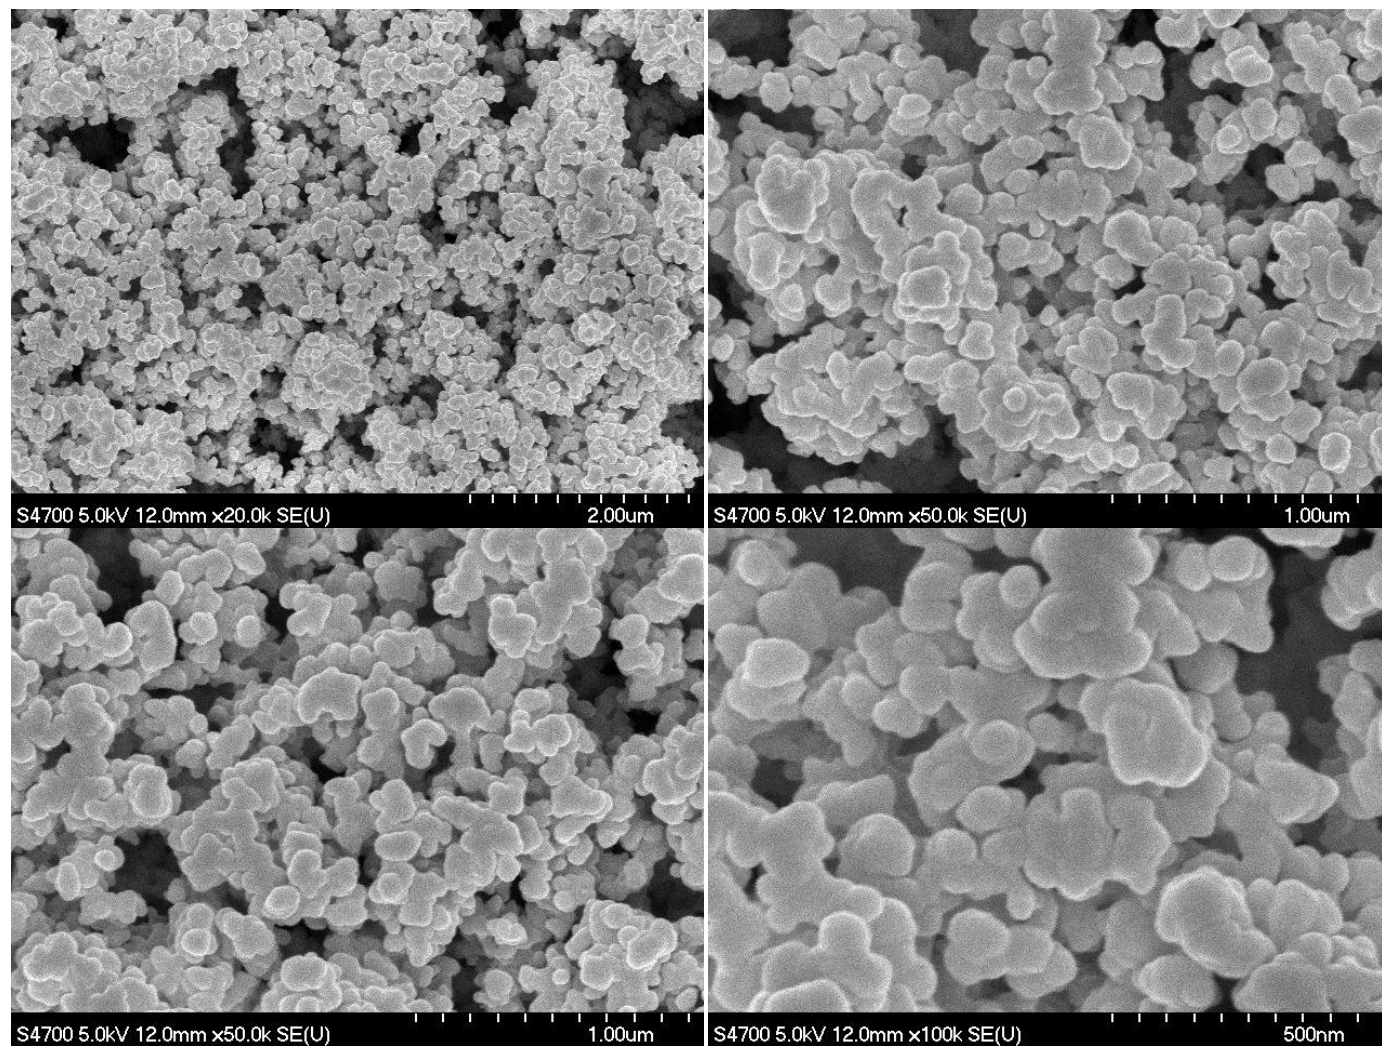

**SI5-NaA22ag**

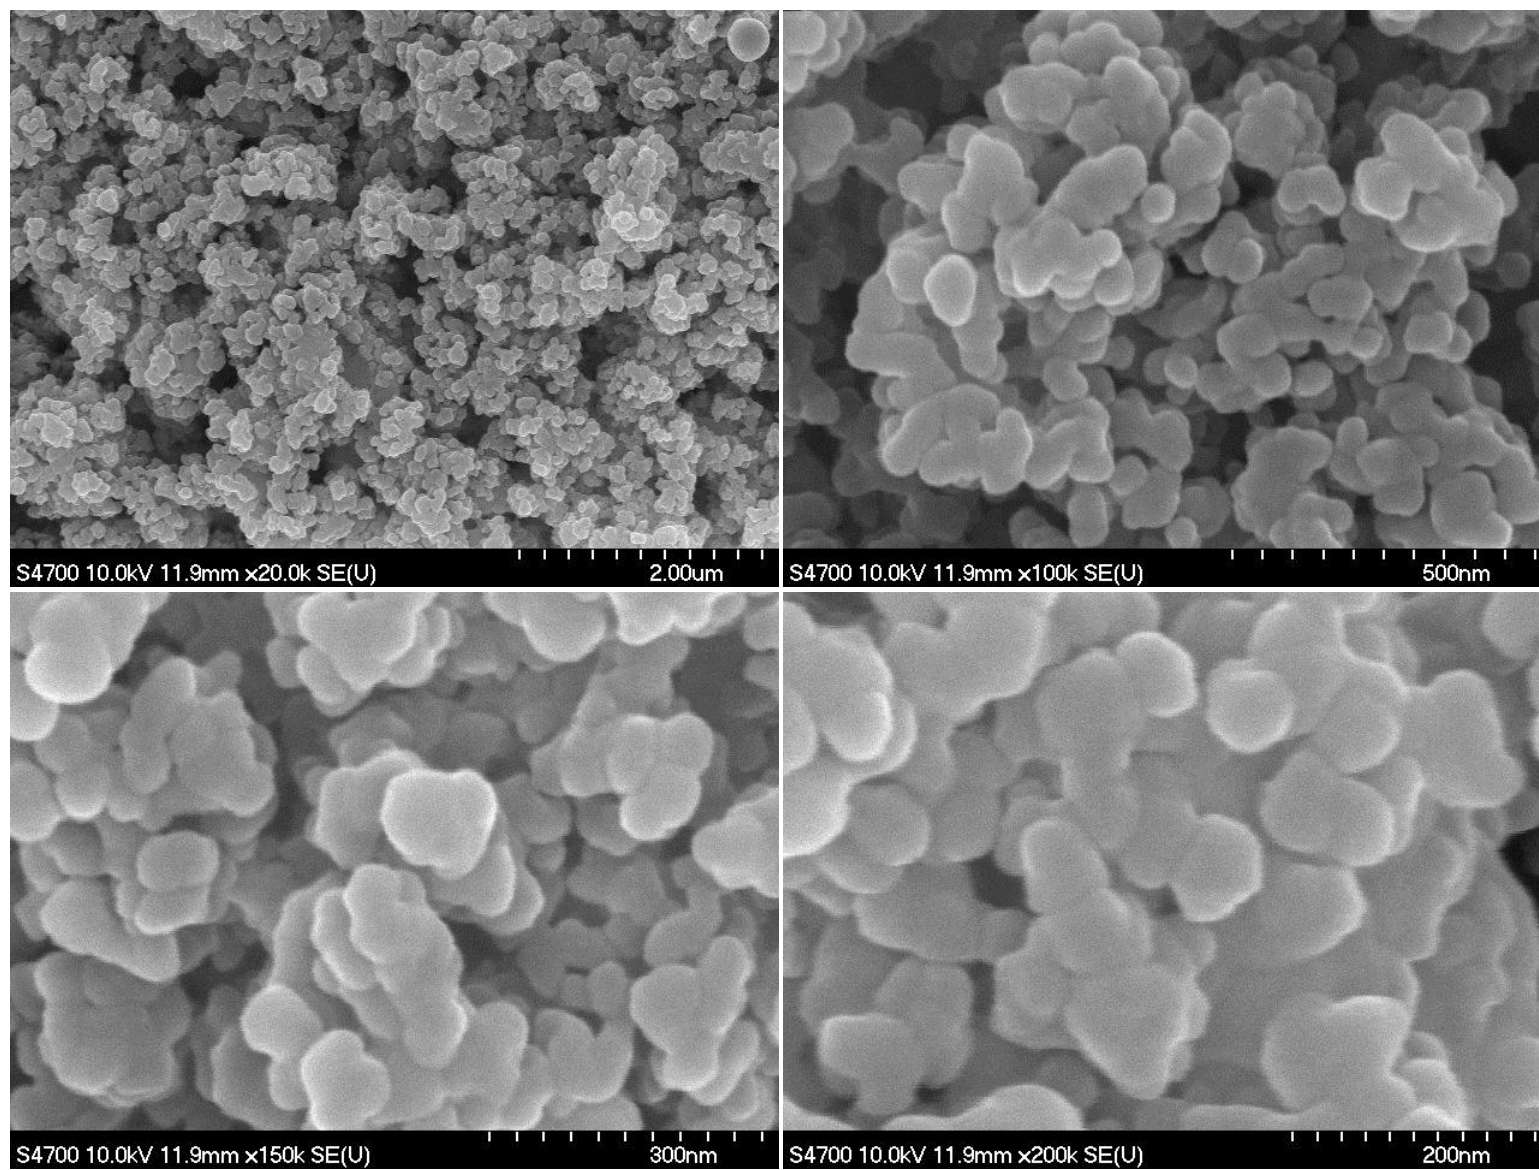

**SI5-NaA0cr**

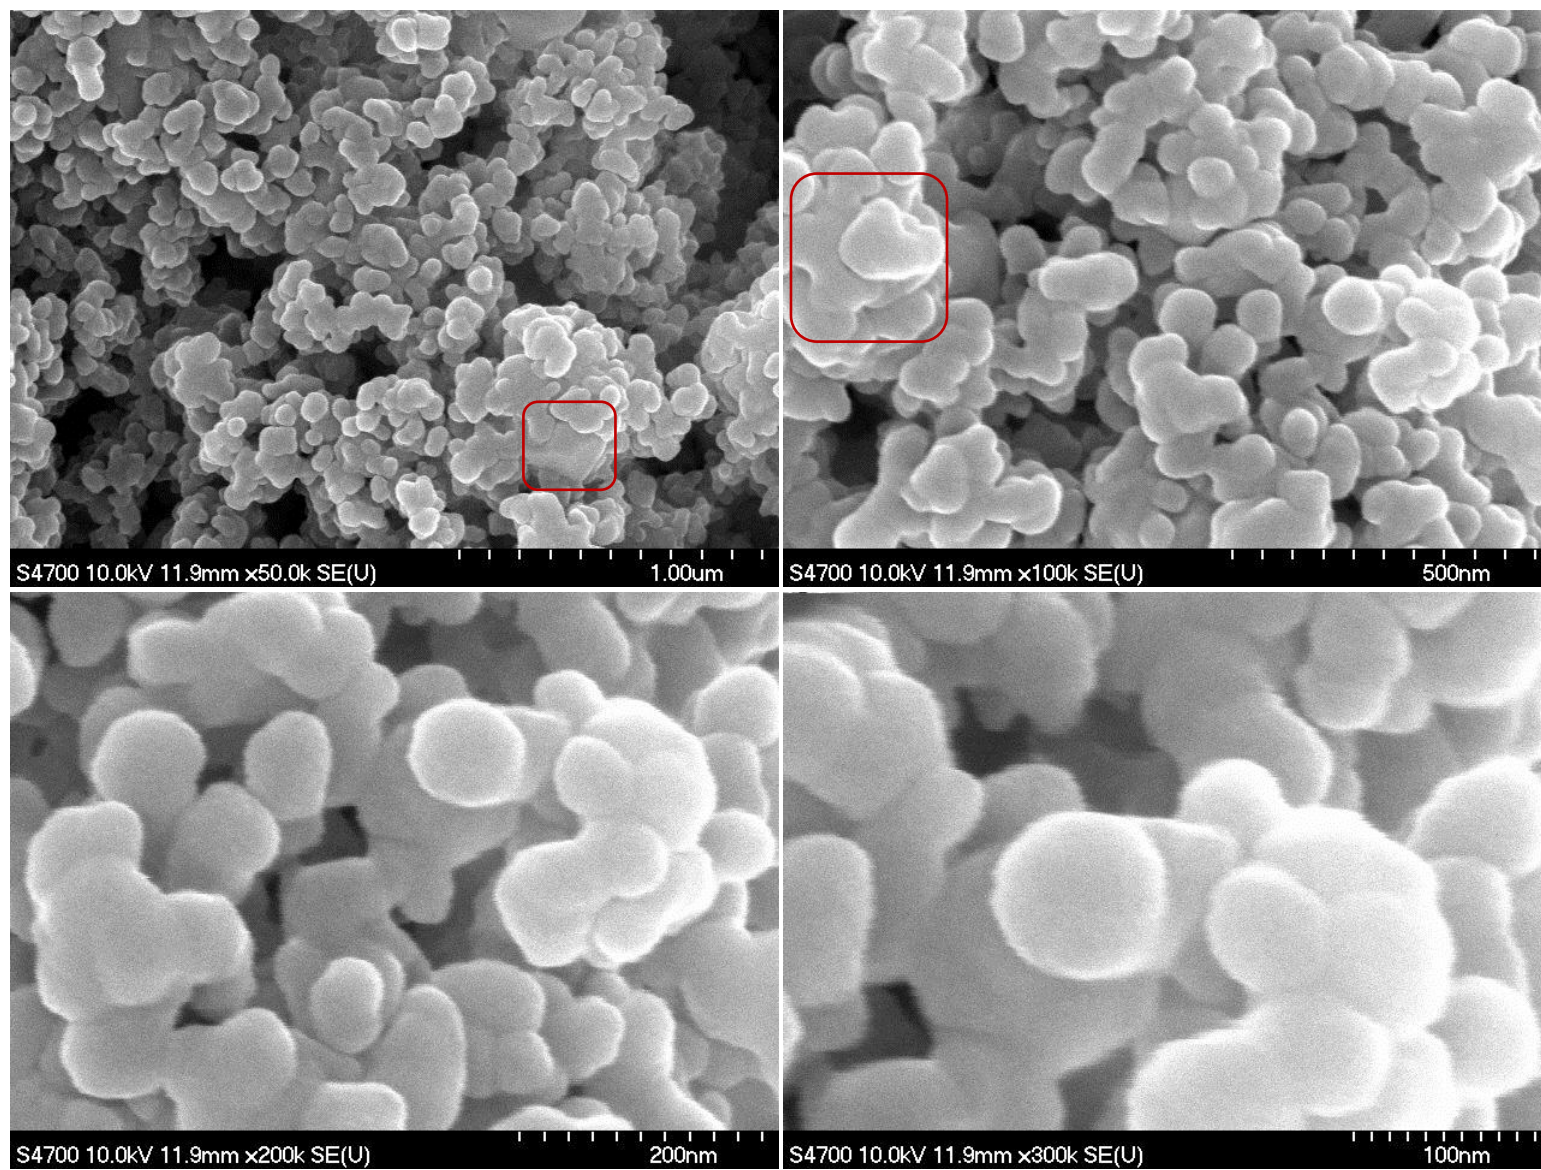

**SI5-NaA0.5cr**

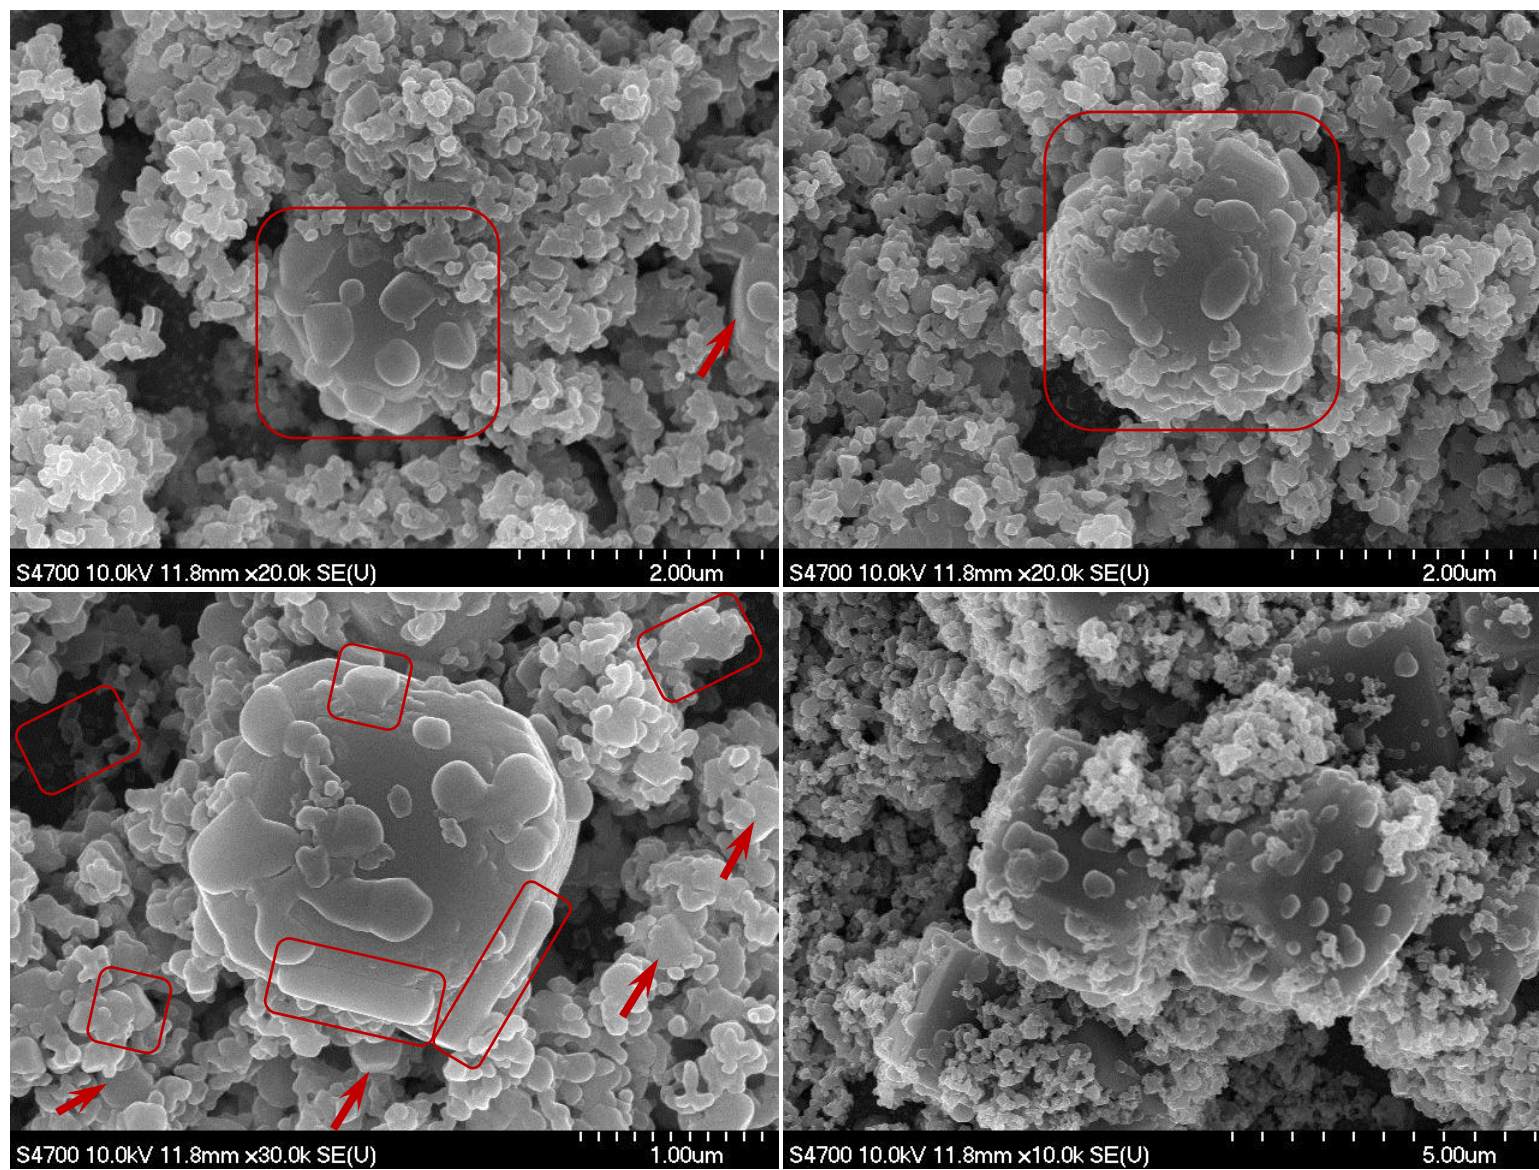

**SI5-NaAlCr**



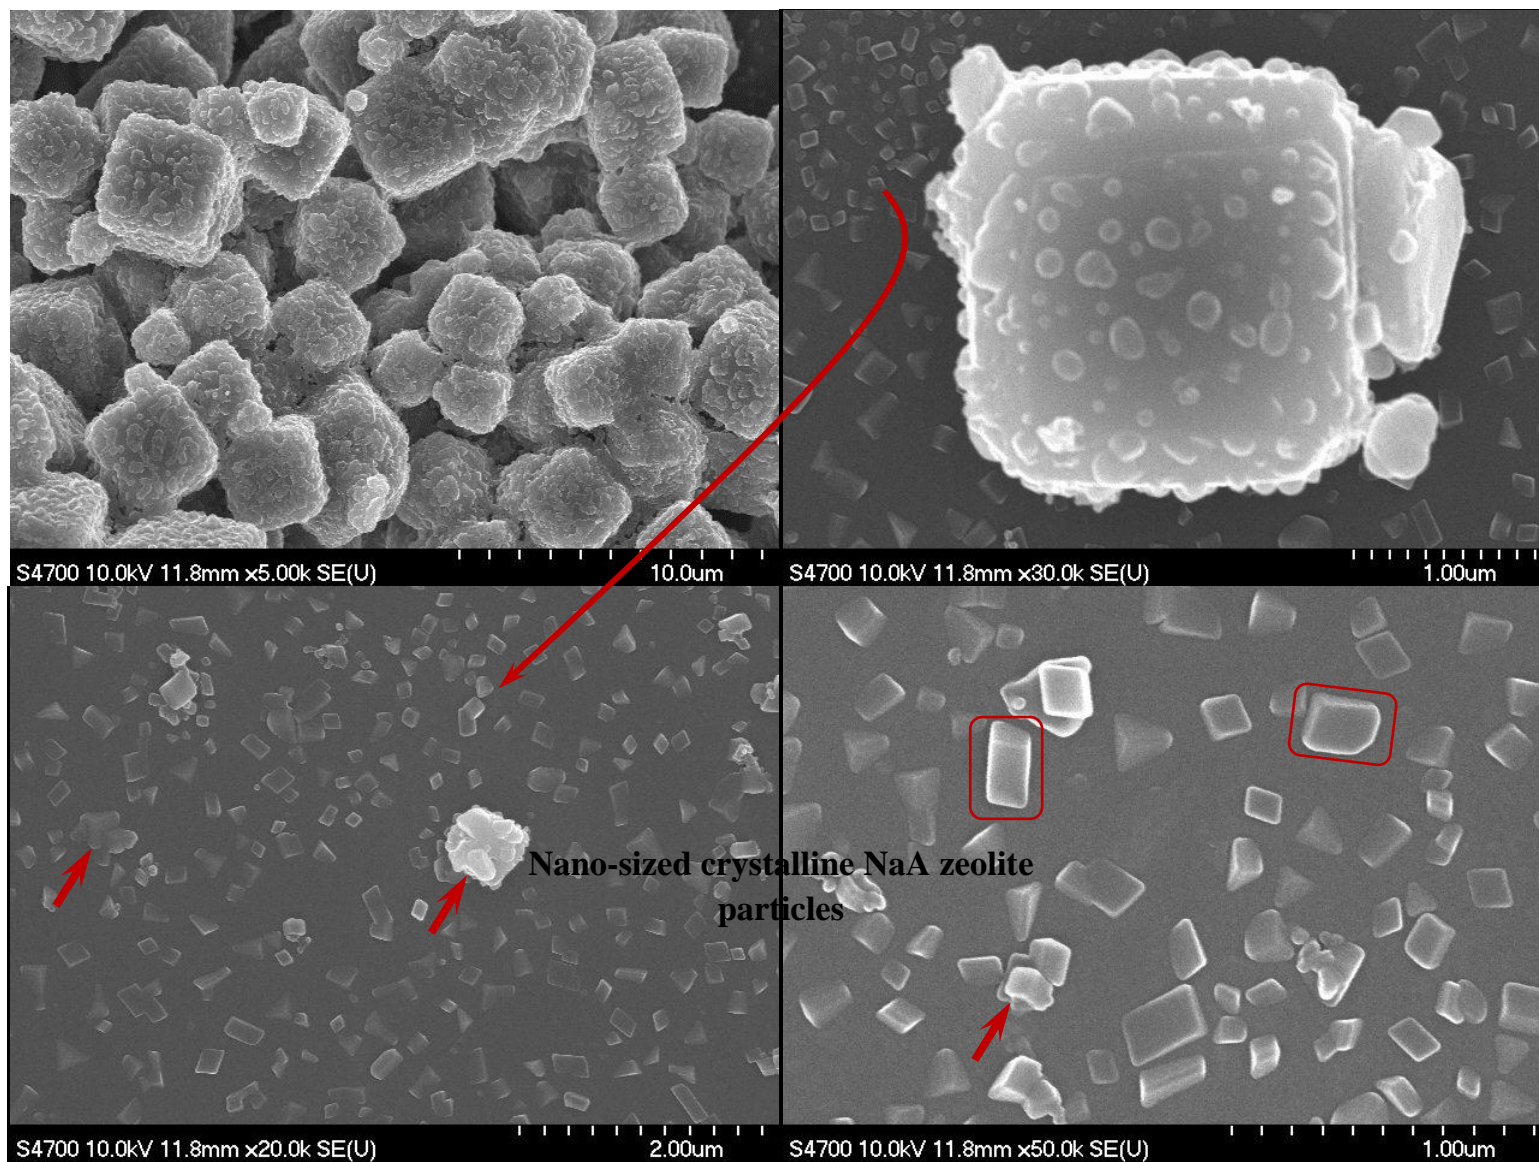

SI5-NaA2cr

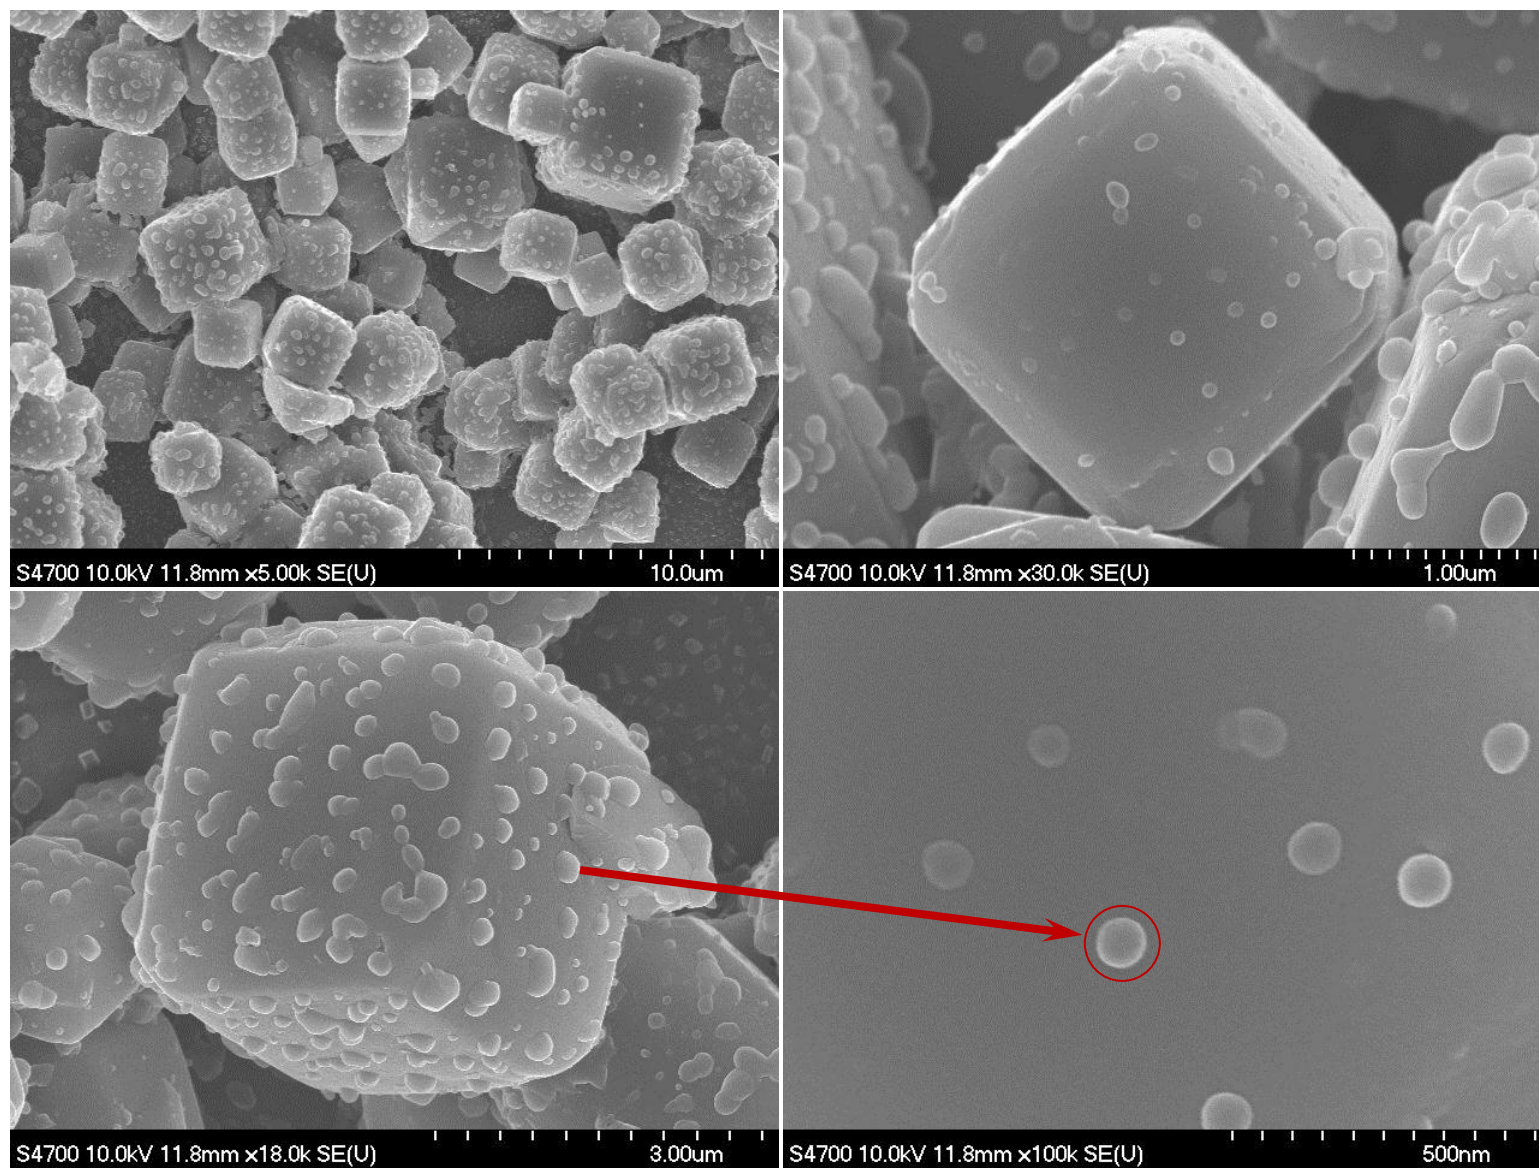

**SI5-NaA3cr**

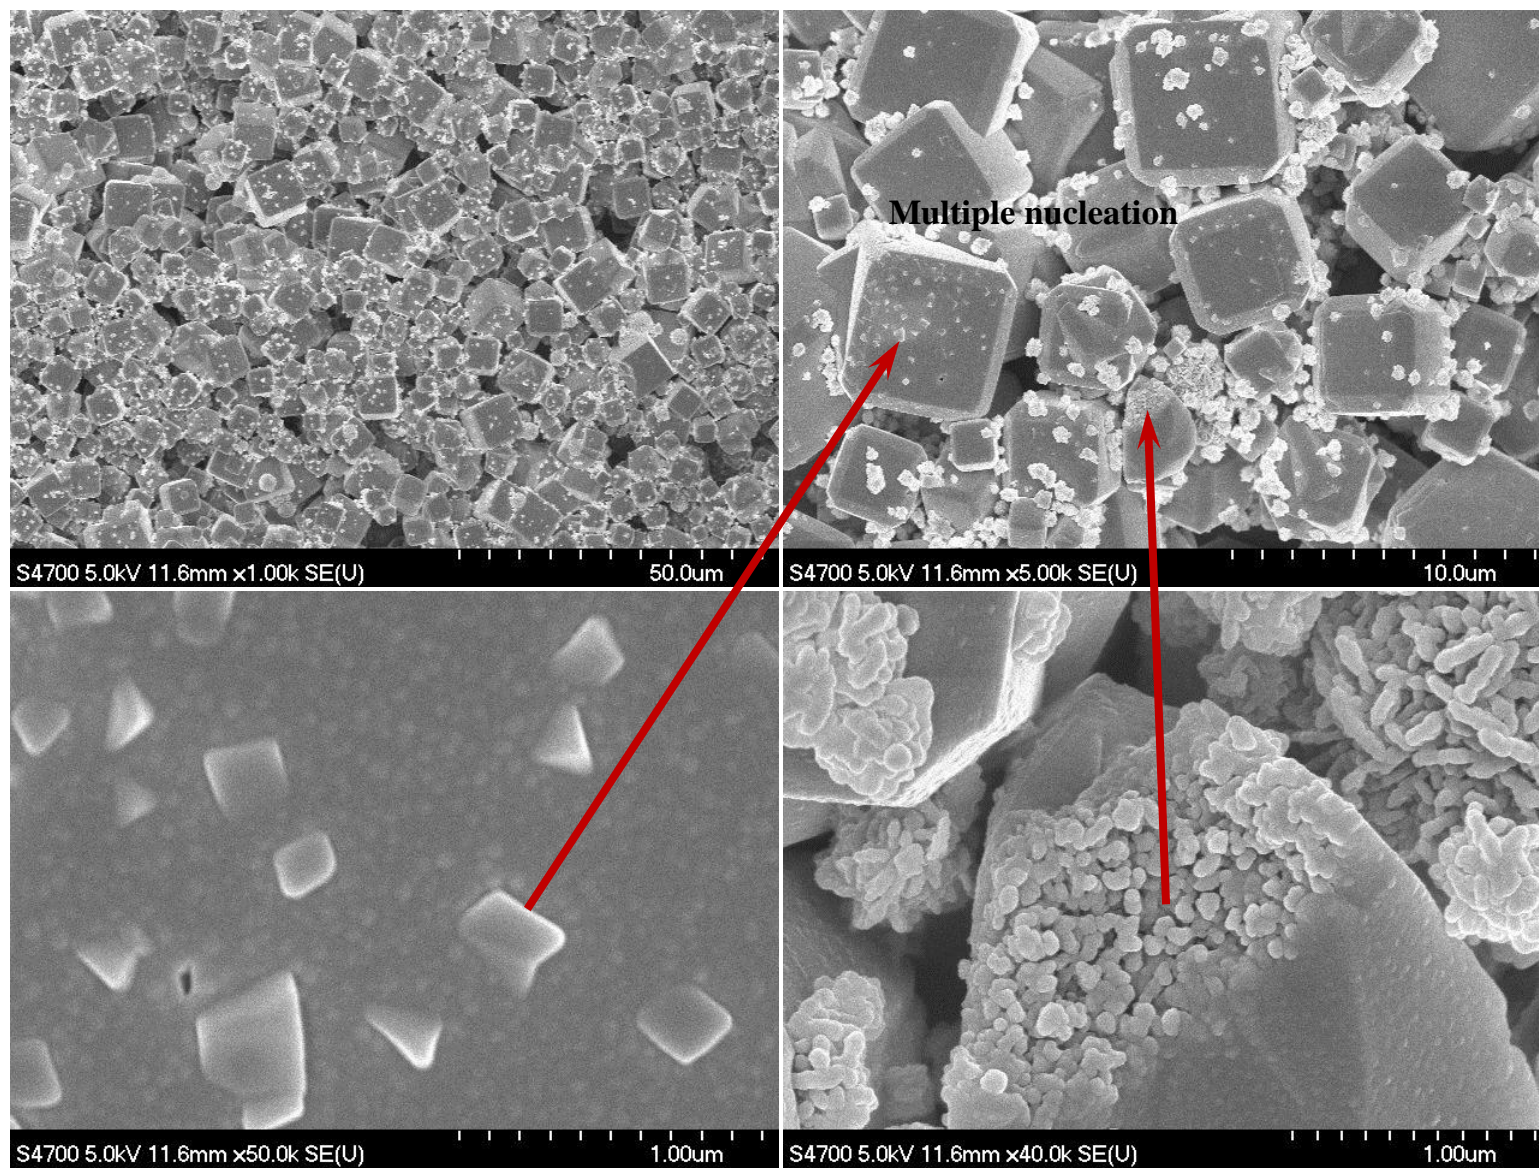

**SI5-NaA4cr**

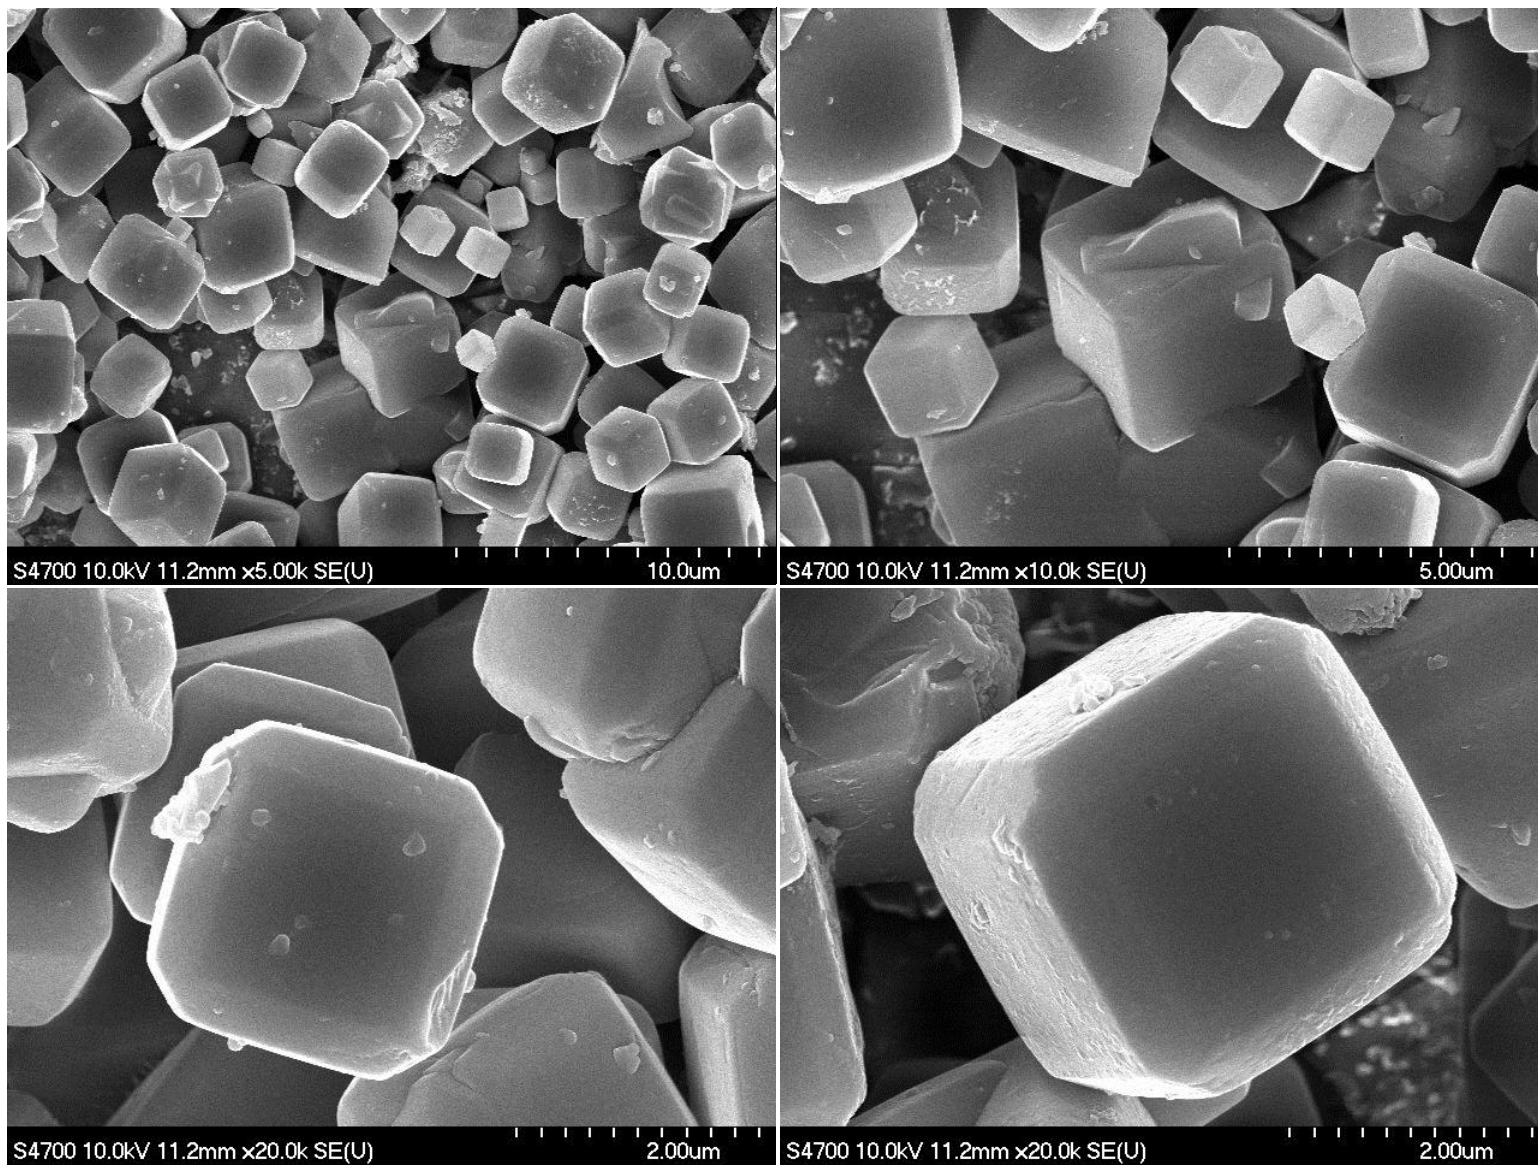

**SI5-NaA5cr**

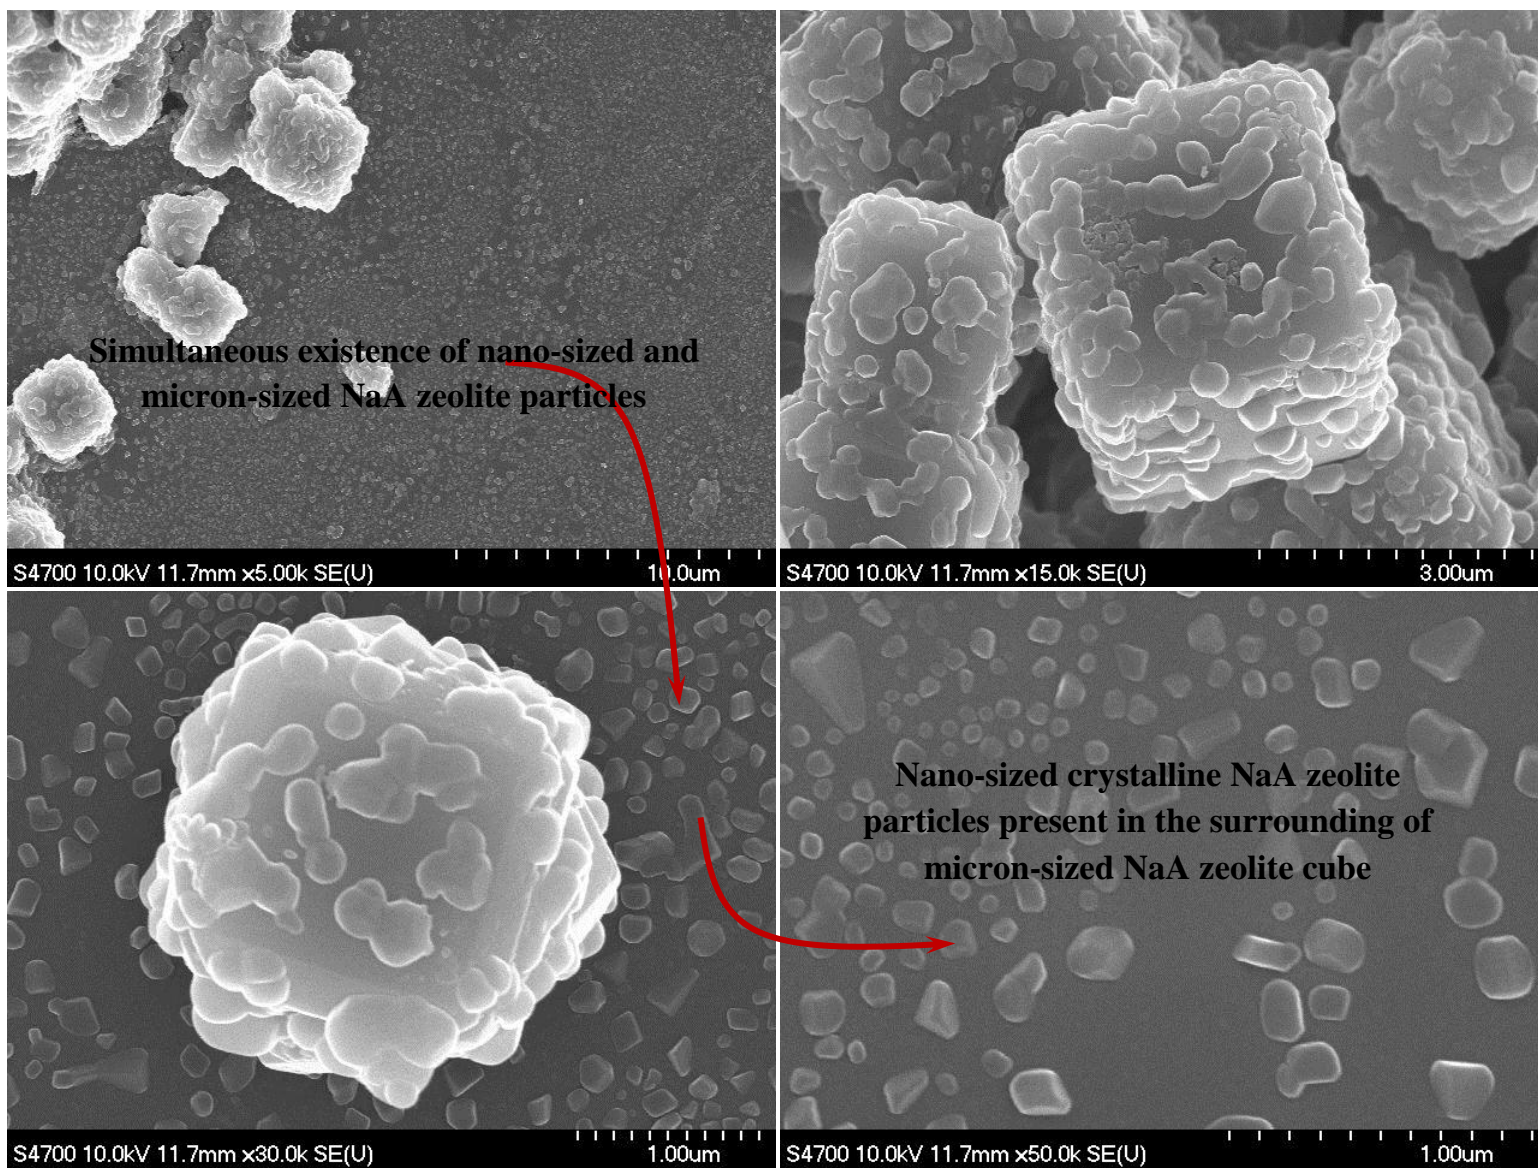

**SI5-NaA7cr**

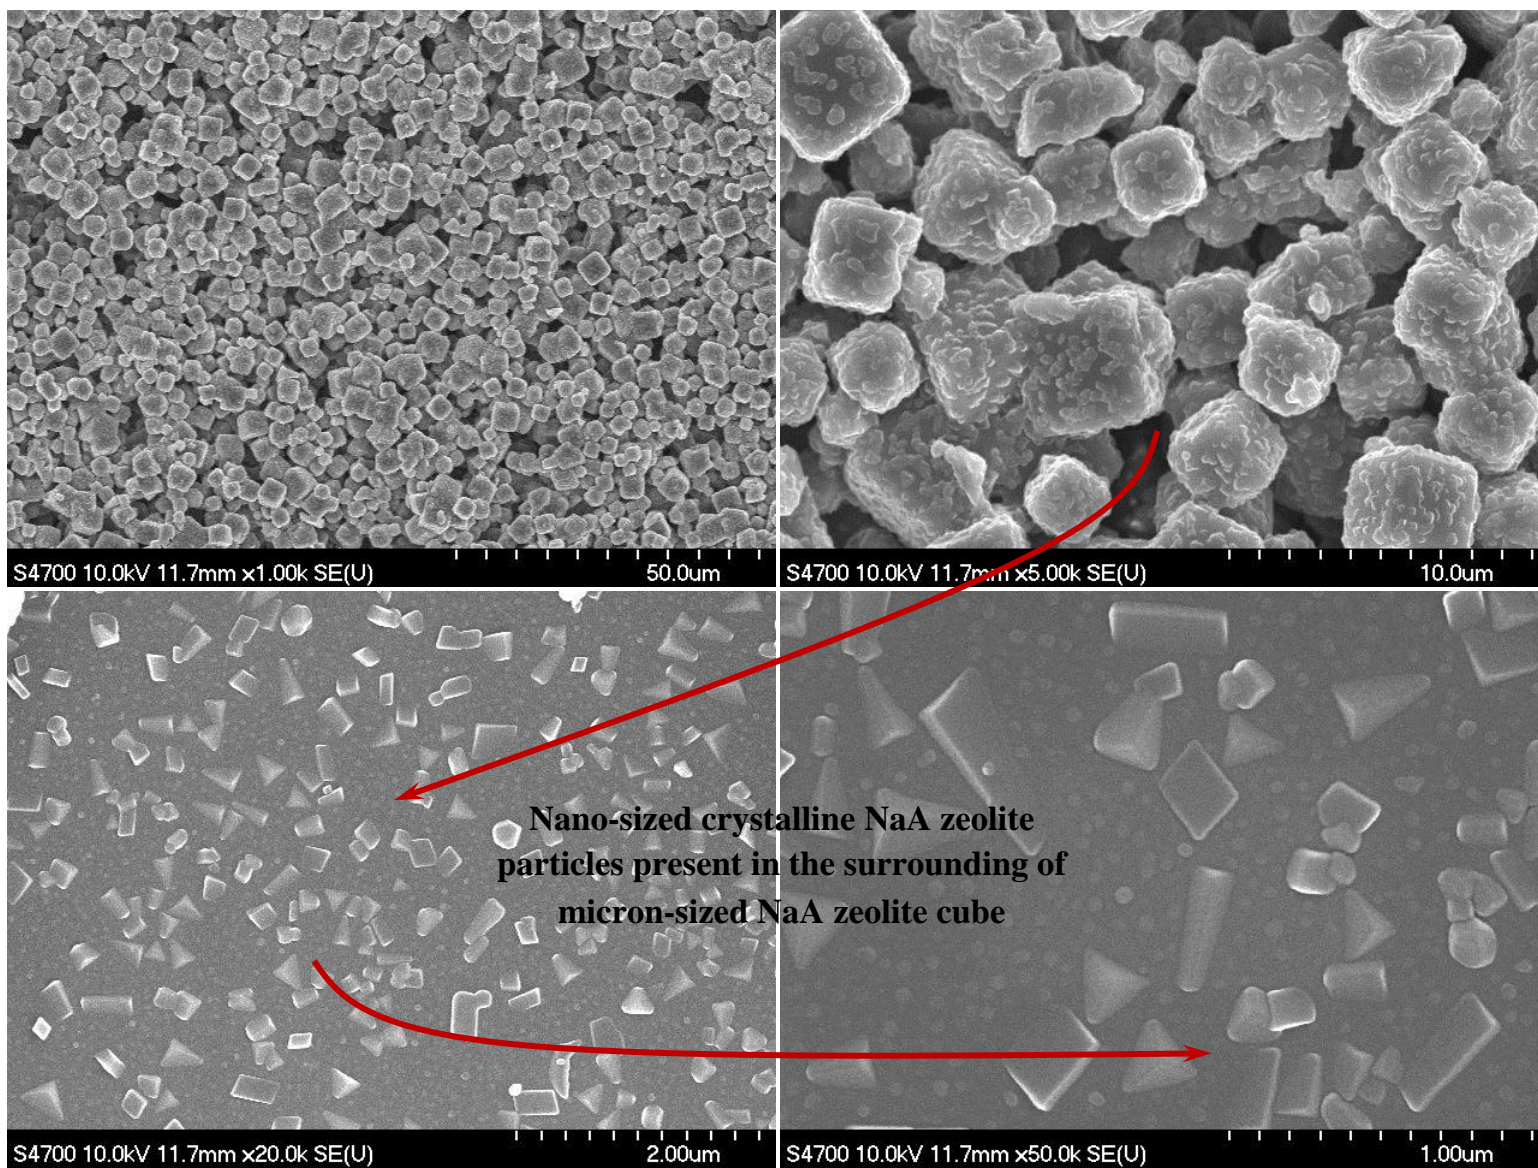

**SI5-NaA9cr**

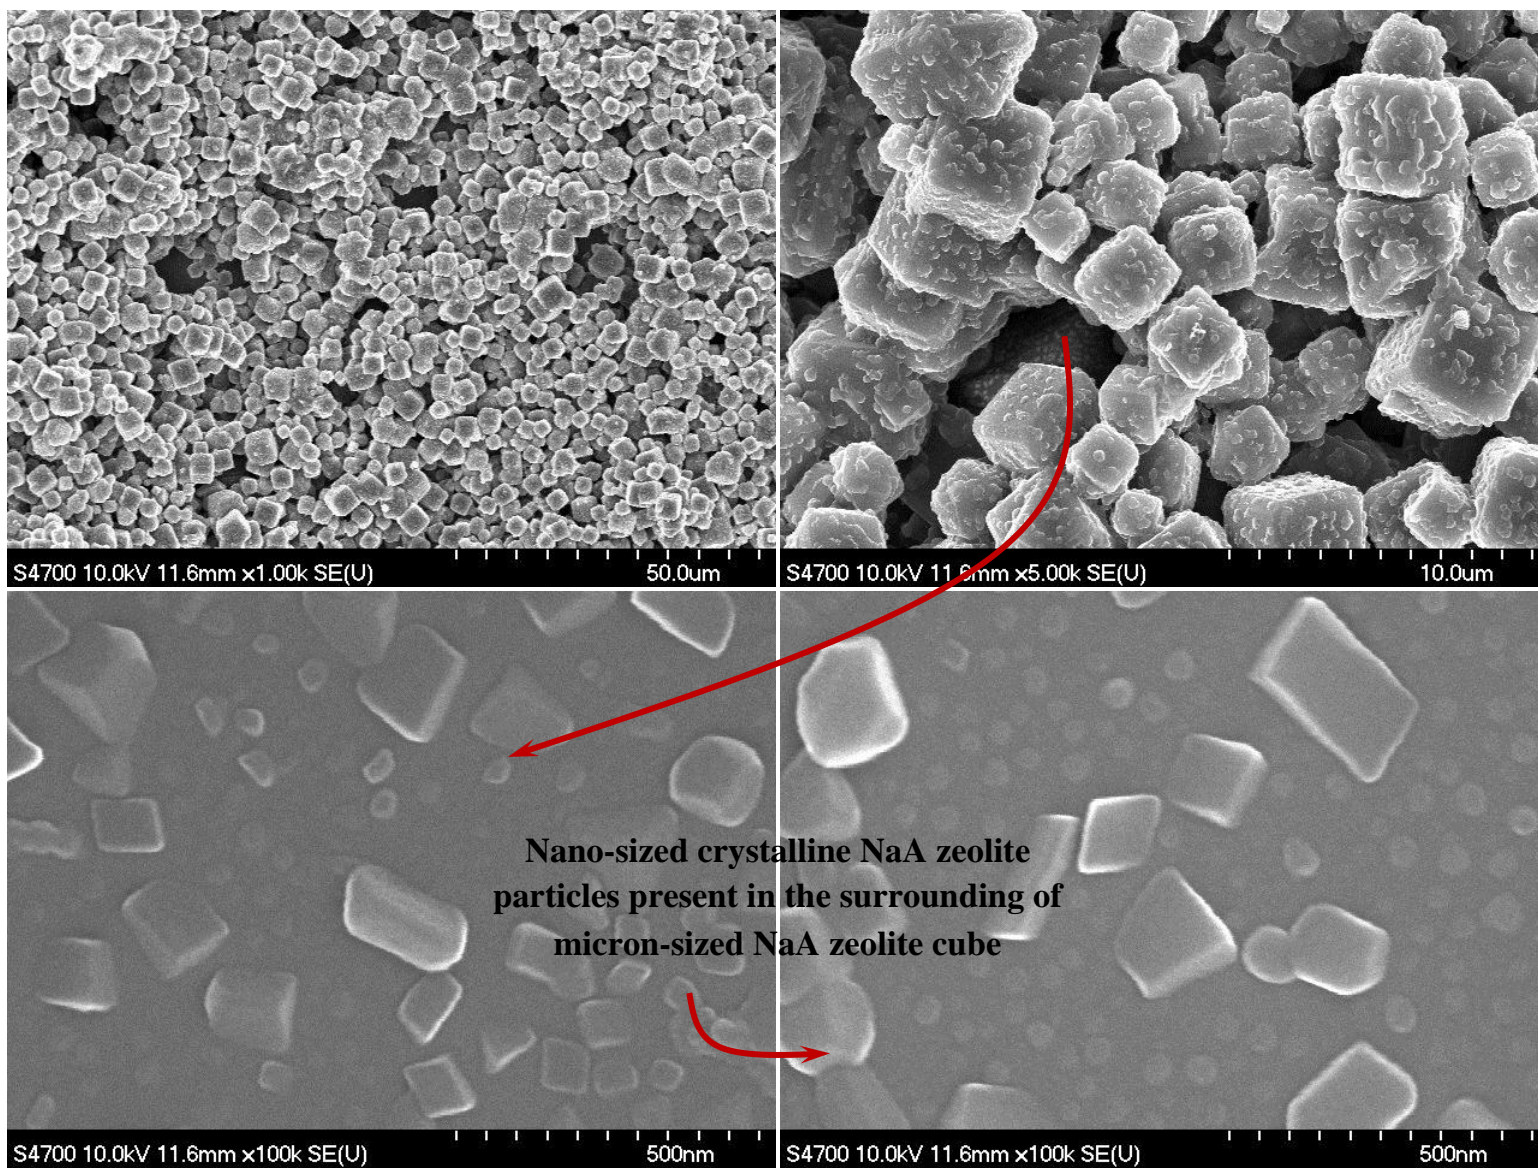

SI5-NaA24cr

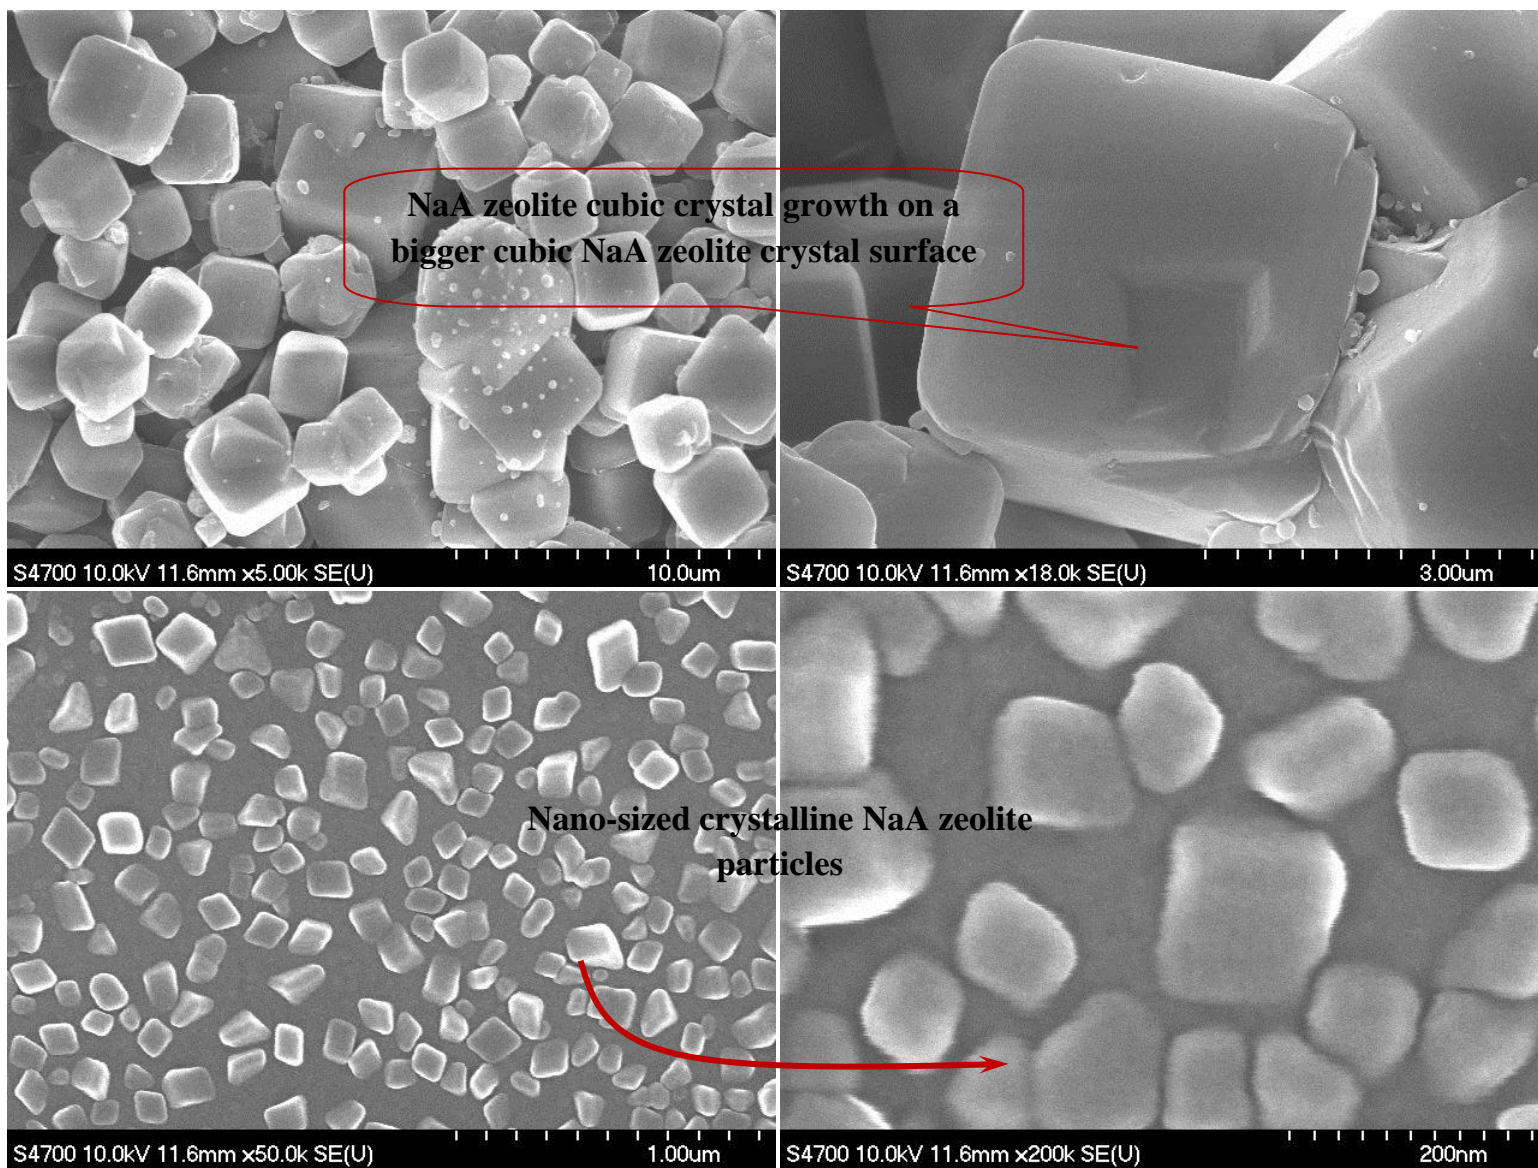

SI5-NaA48cr



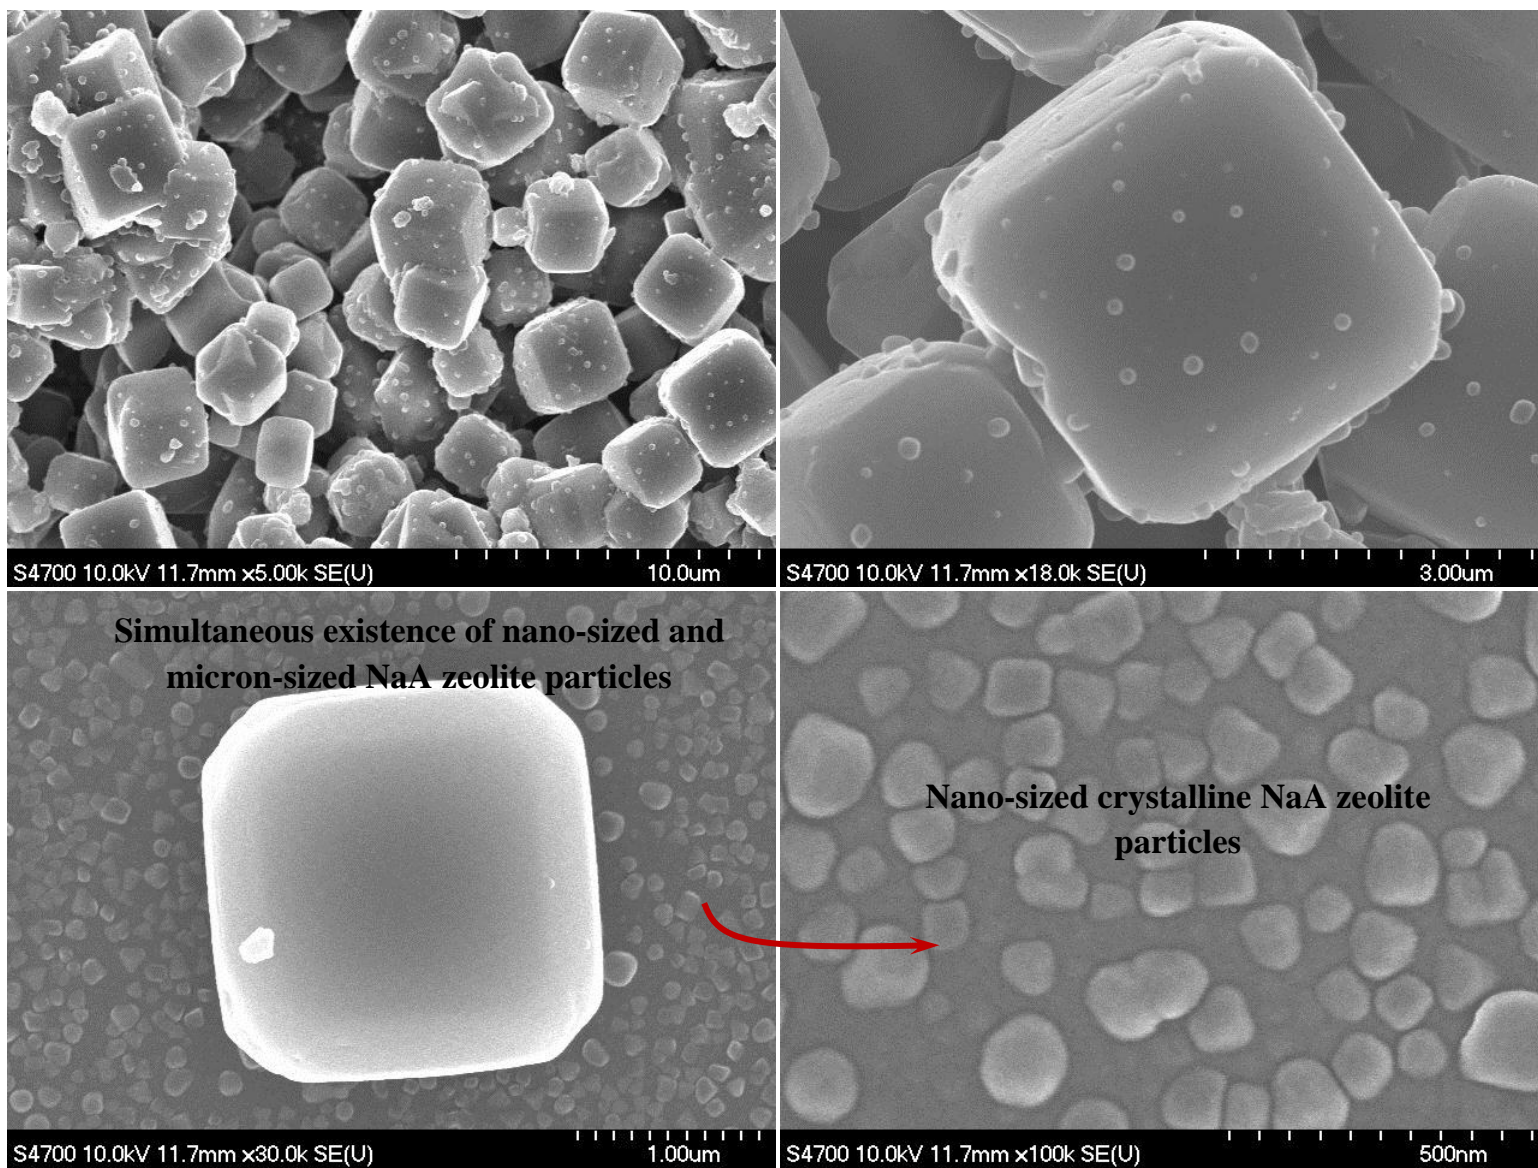

SI5-NaA72cr

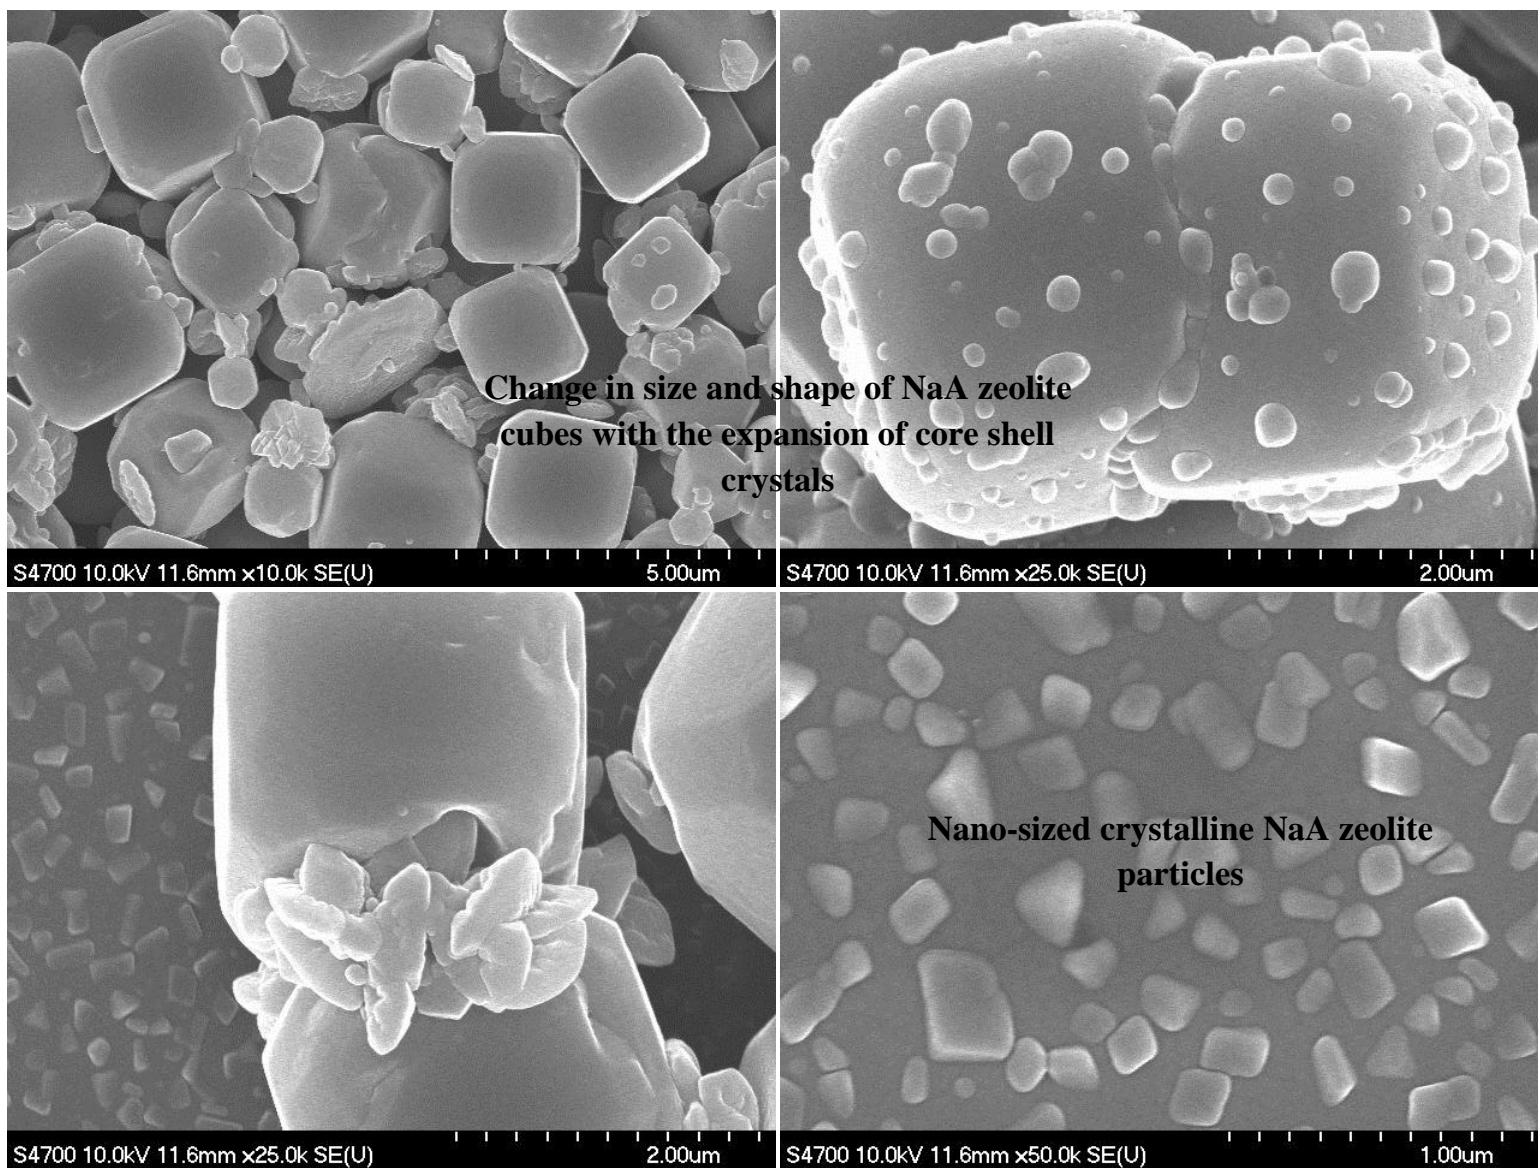

SI5-NaA96cr

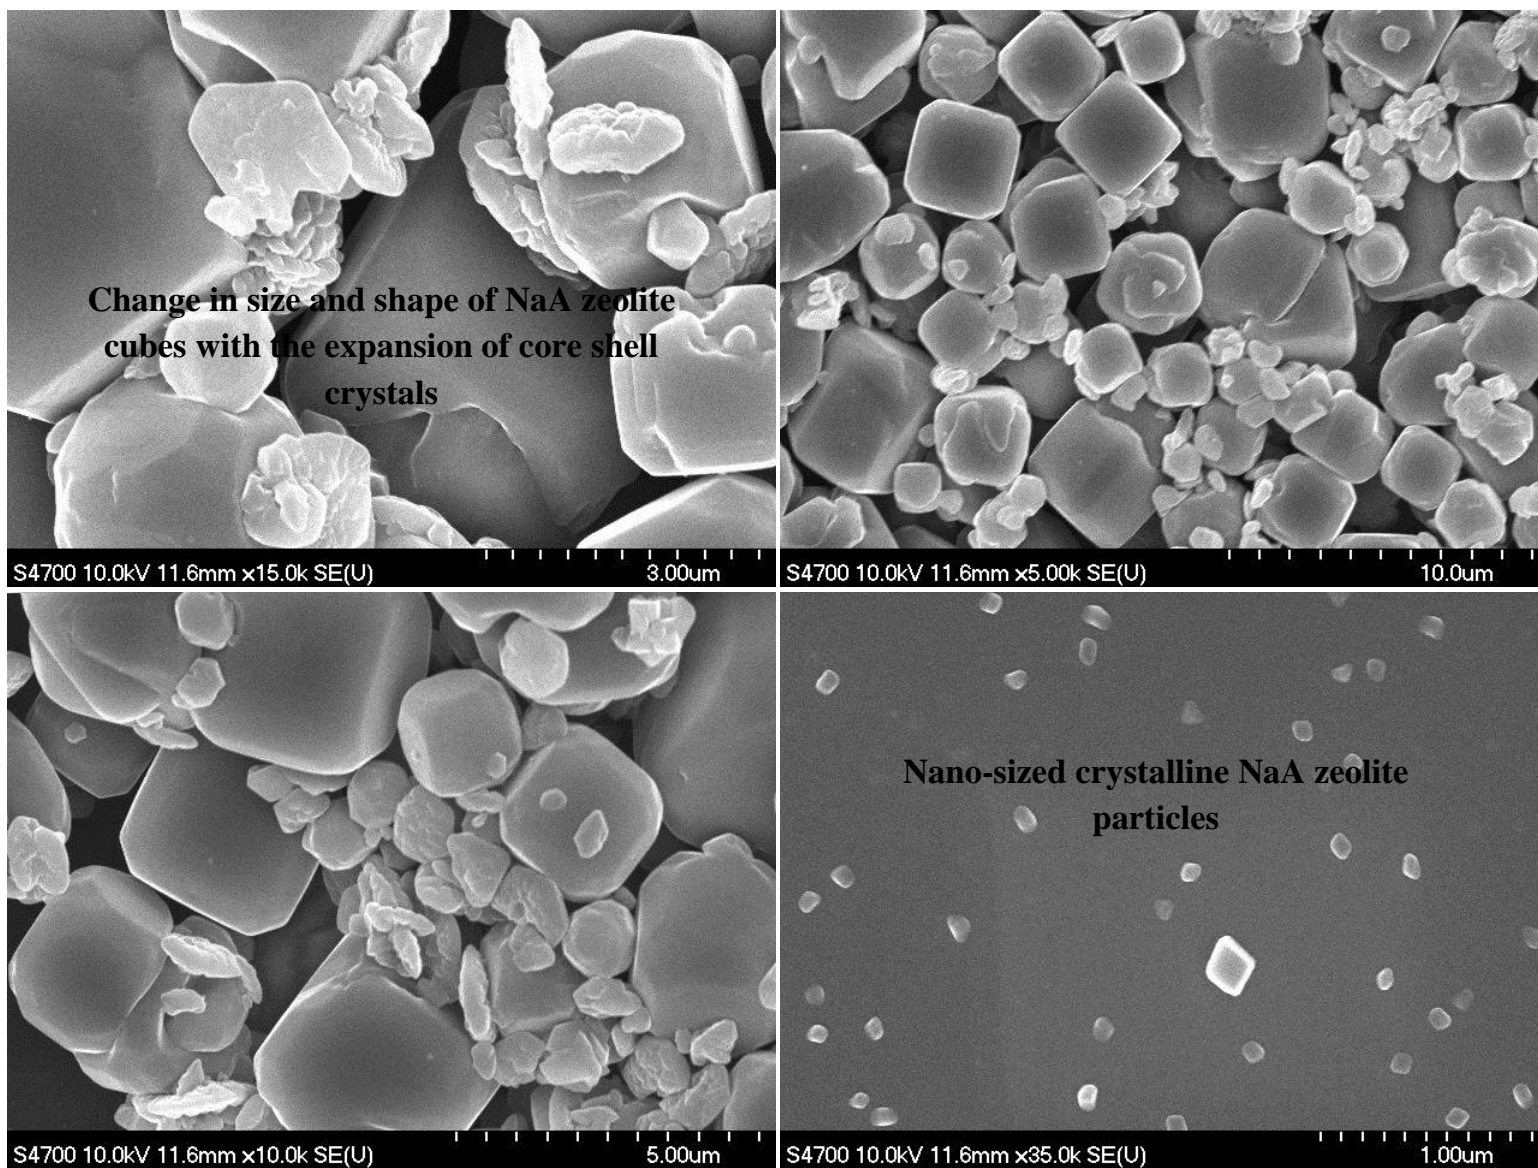

**SI5-NaA120cr**

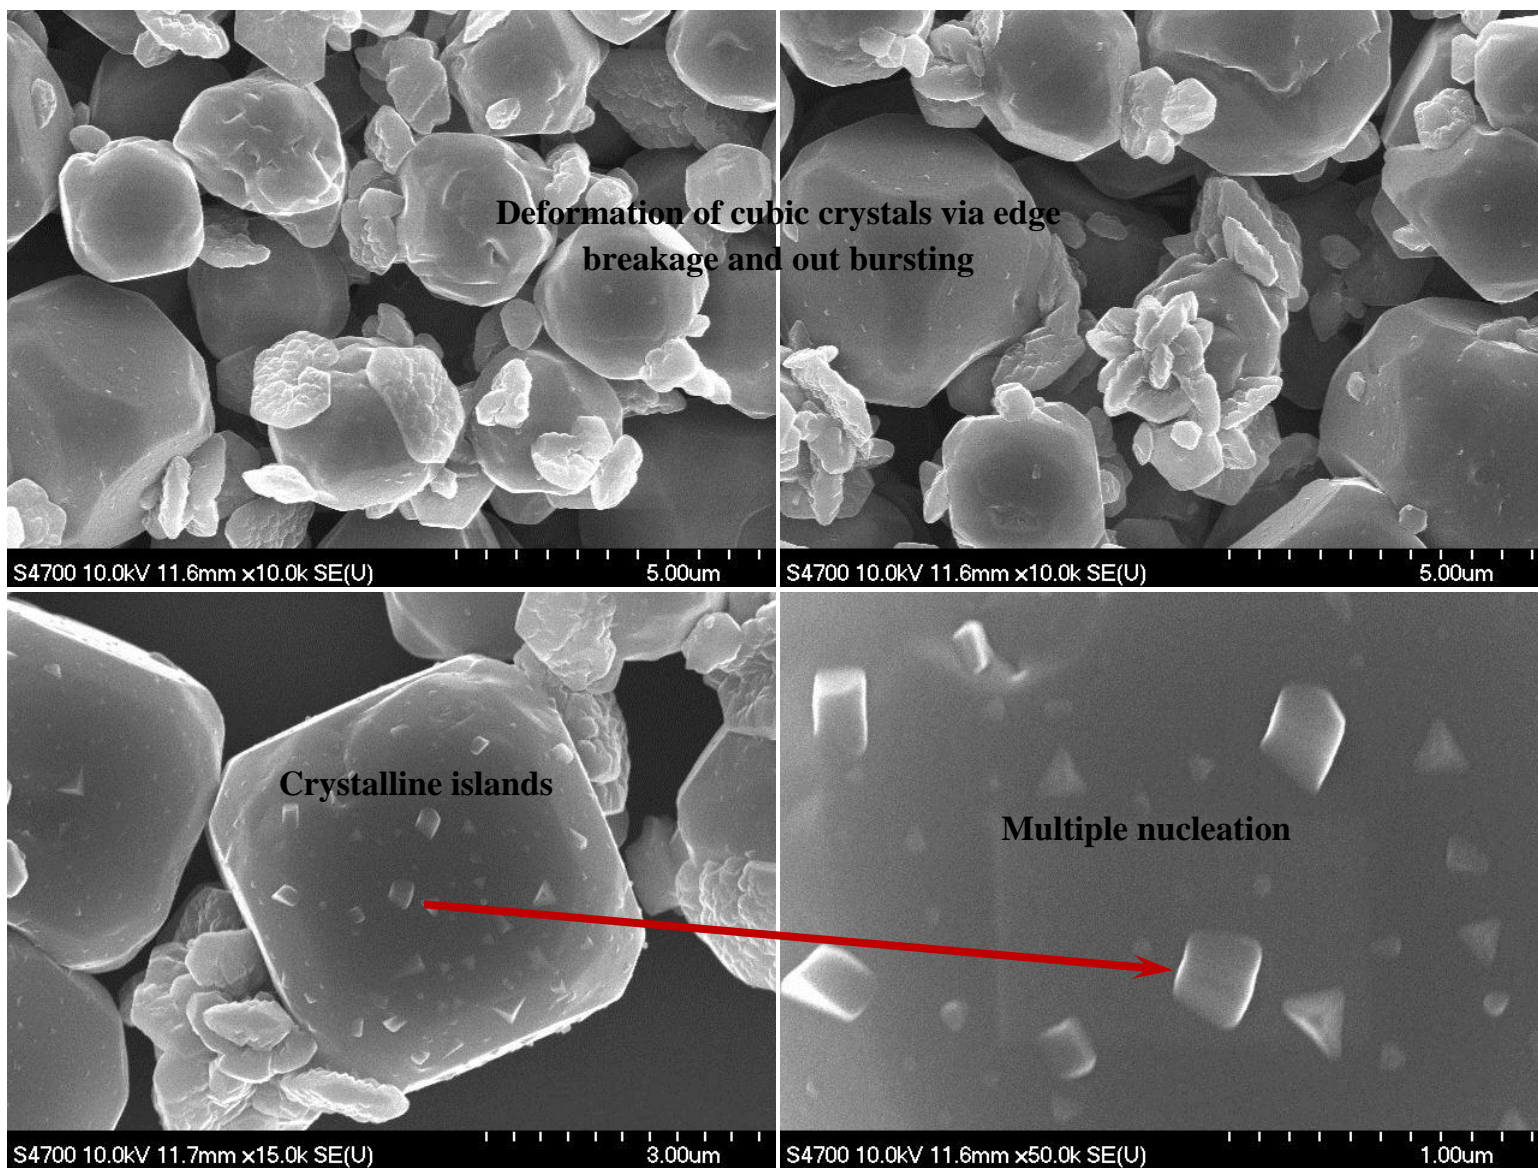

**SI5-NaA144cr**

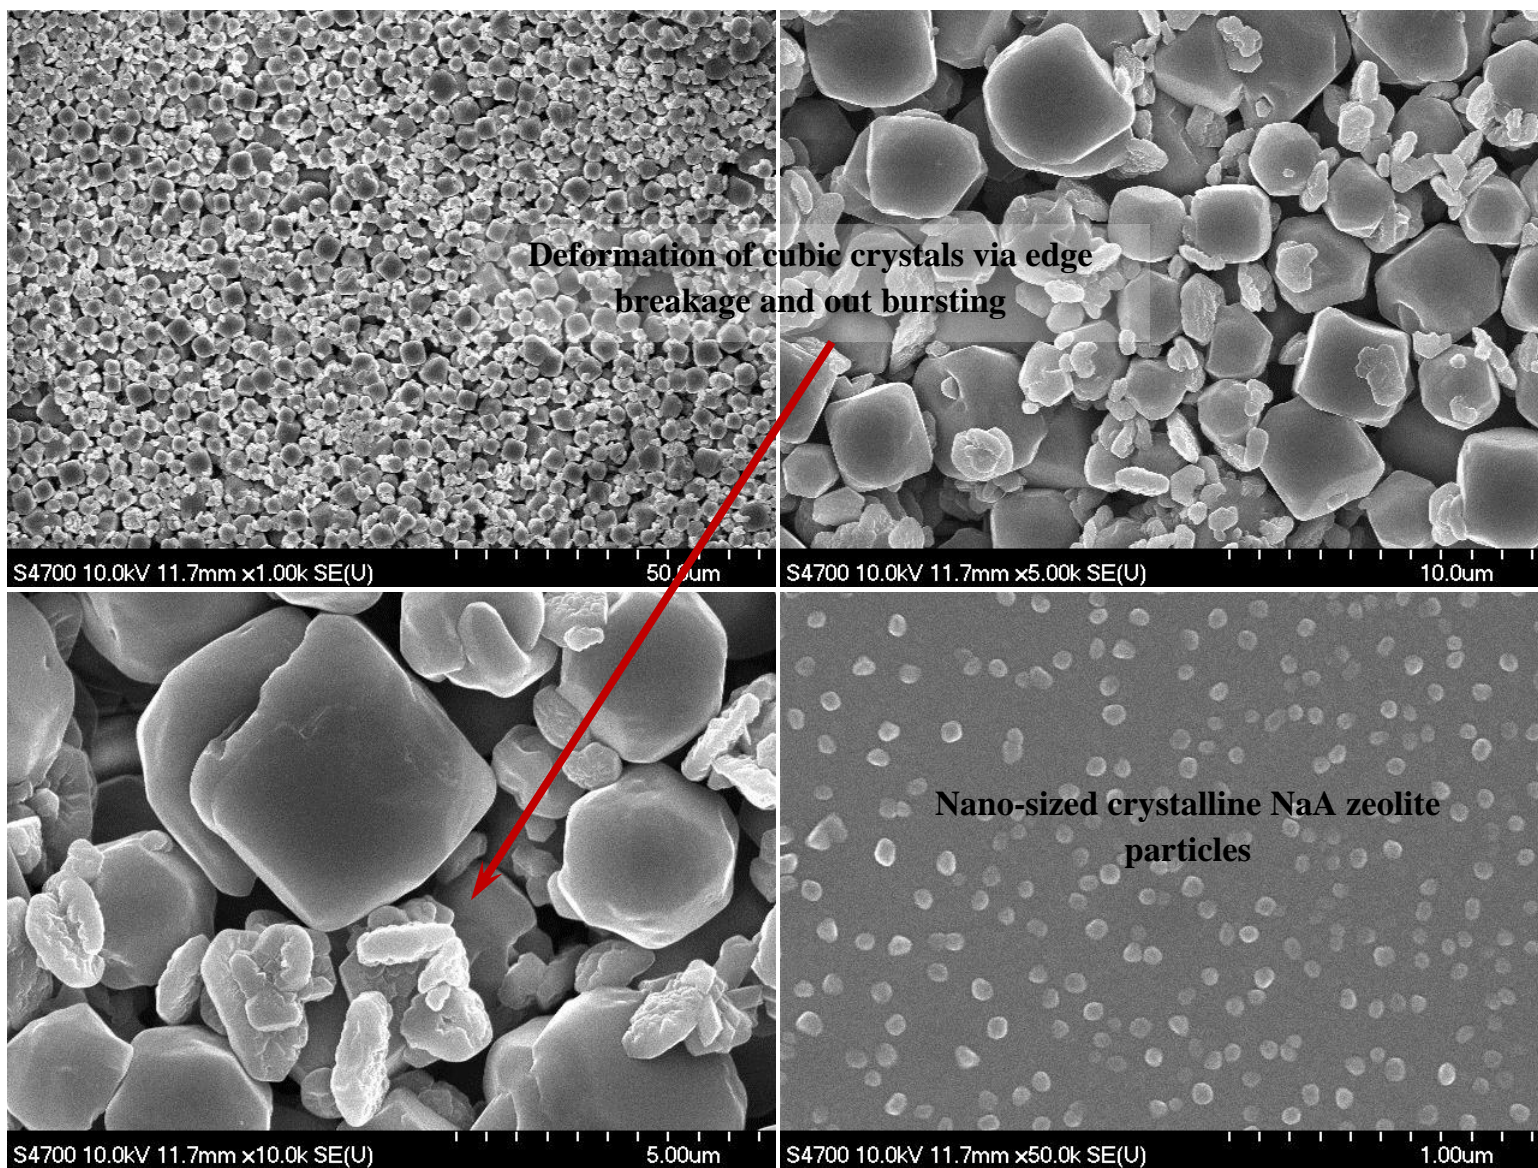

**SI5-NaA168cr**

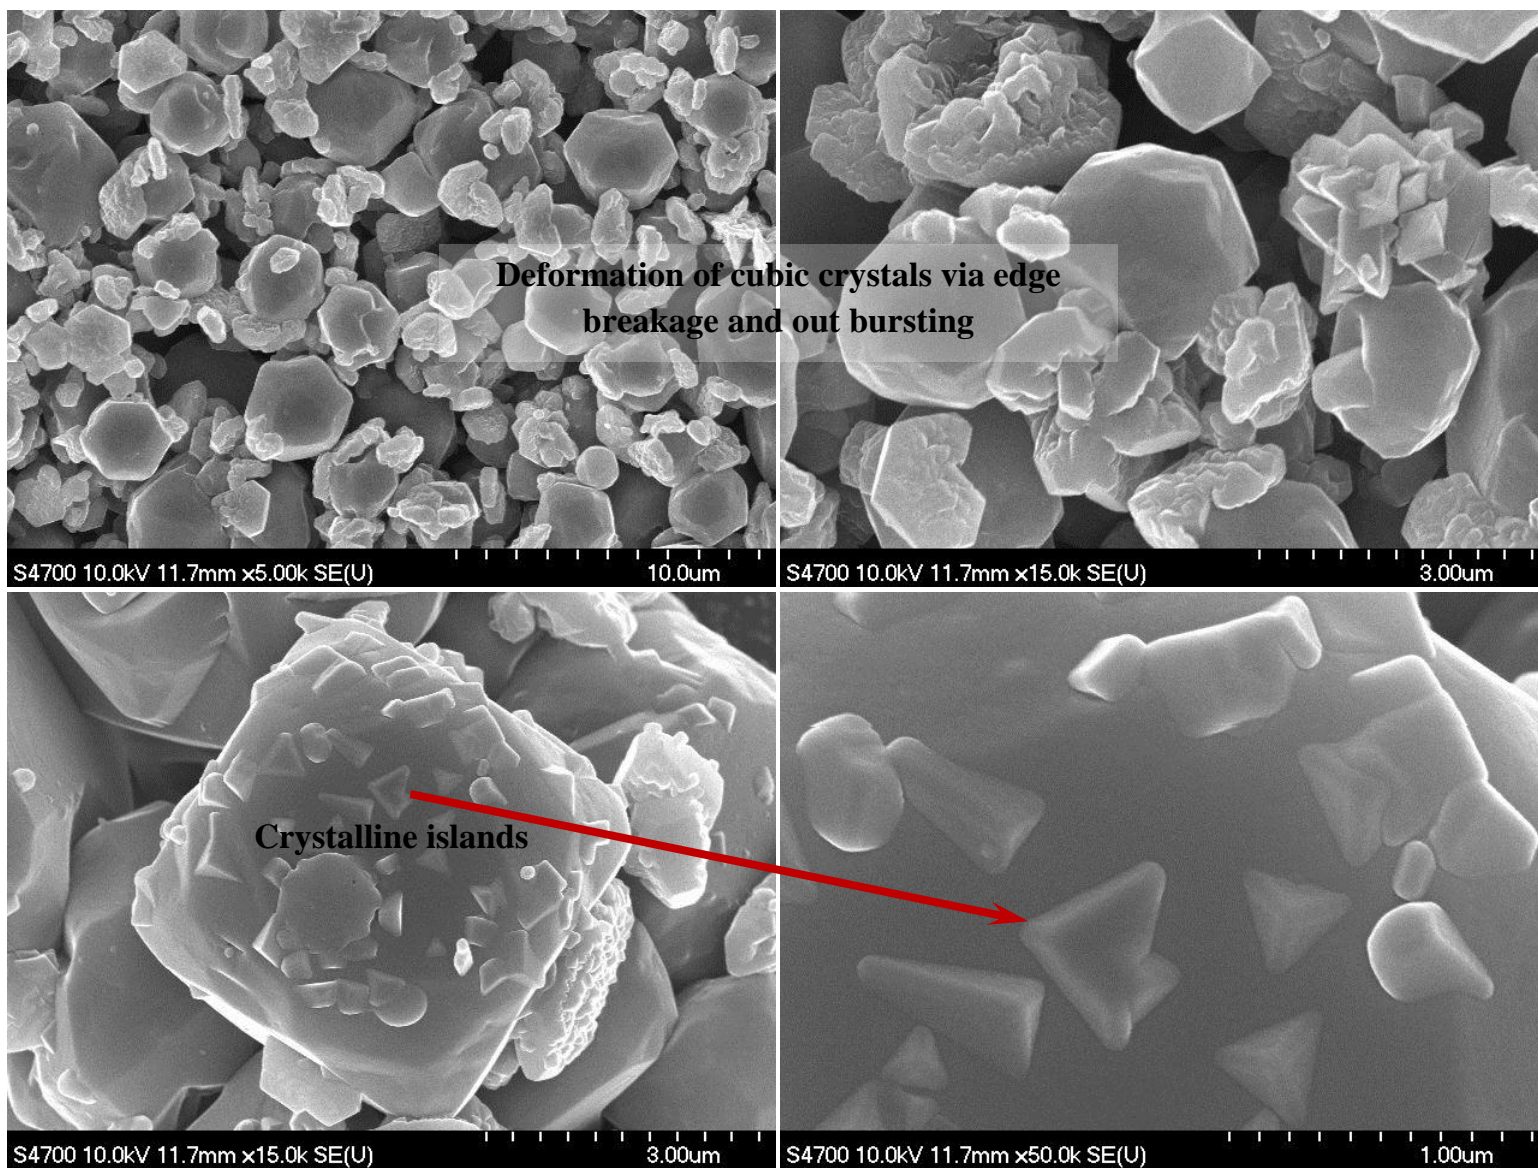

**SI5-NaA192cr**

## SI6

TEM micrographs of the specimens collected at 0 h (NaA0cr), 0.5 h (NaA0.5cr), 1 h (NaA1cr), 4 h (NaA4cr), 9 h (NaA9cr), 72 h (NaA72cr) and 96 h (NaA96cr) of crystallization showing the micron-size cubes equipped with nano-size crystals (also showing surface grown crystals). As an inset in NaA0cr, NaA0.5cr, NaA1cr, NaA4cr, NaA7cr and NaA72cr SAED patterns reveals the crystalline/polycrystalline nature of PCIP and cubic crystals. The other inset in NaA96cr, a HRTEM image demonstrates the intimately inter-grown NaA zeolite crystals.

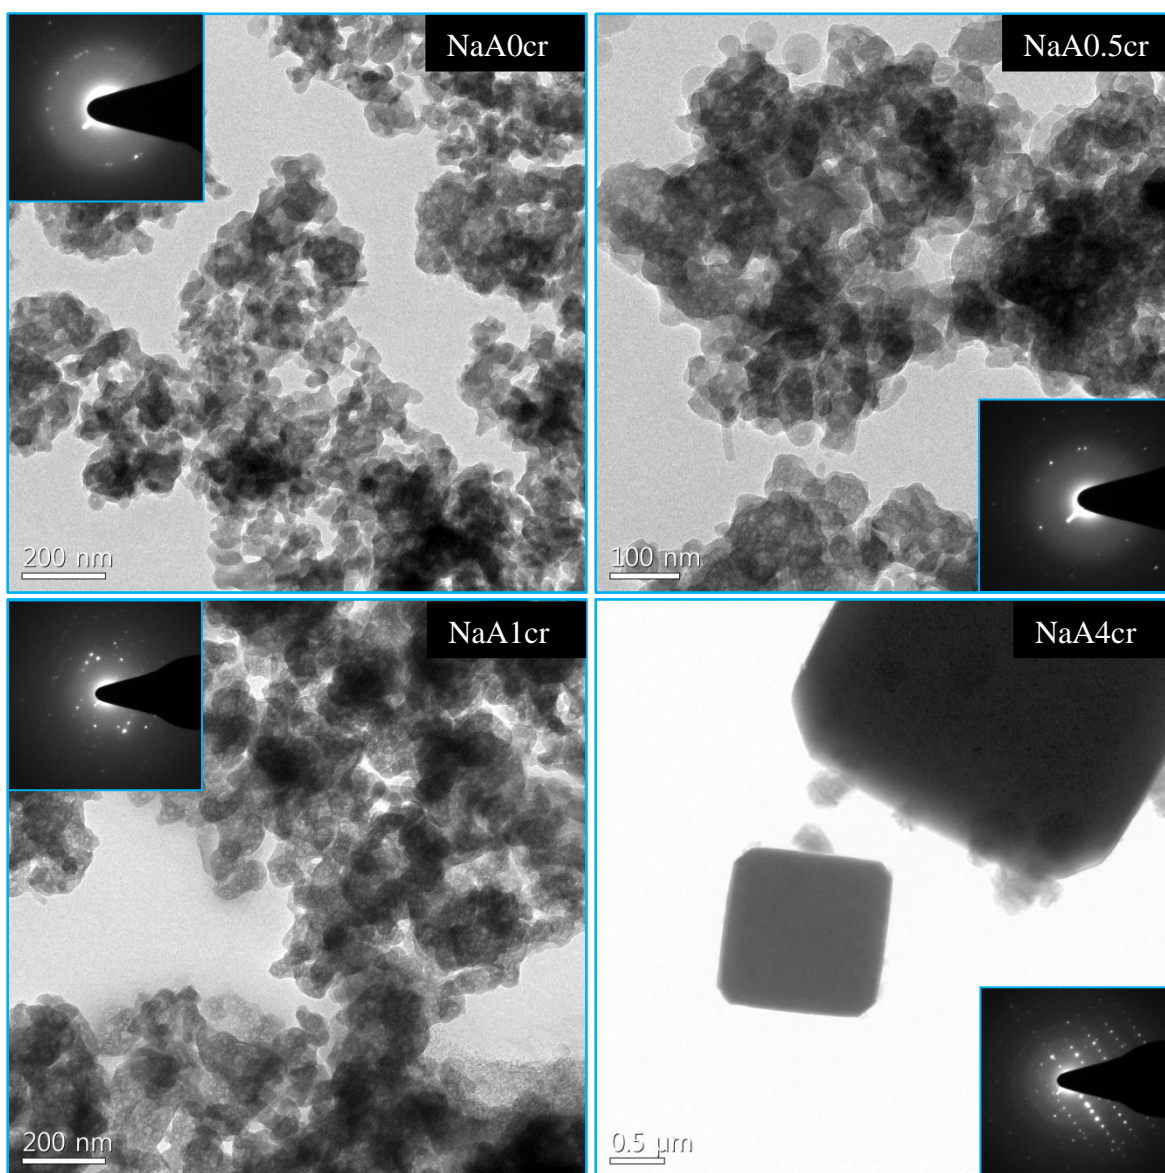

SI6 (continued)

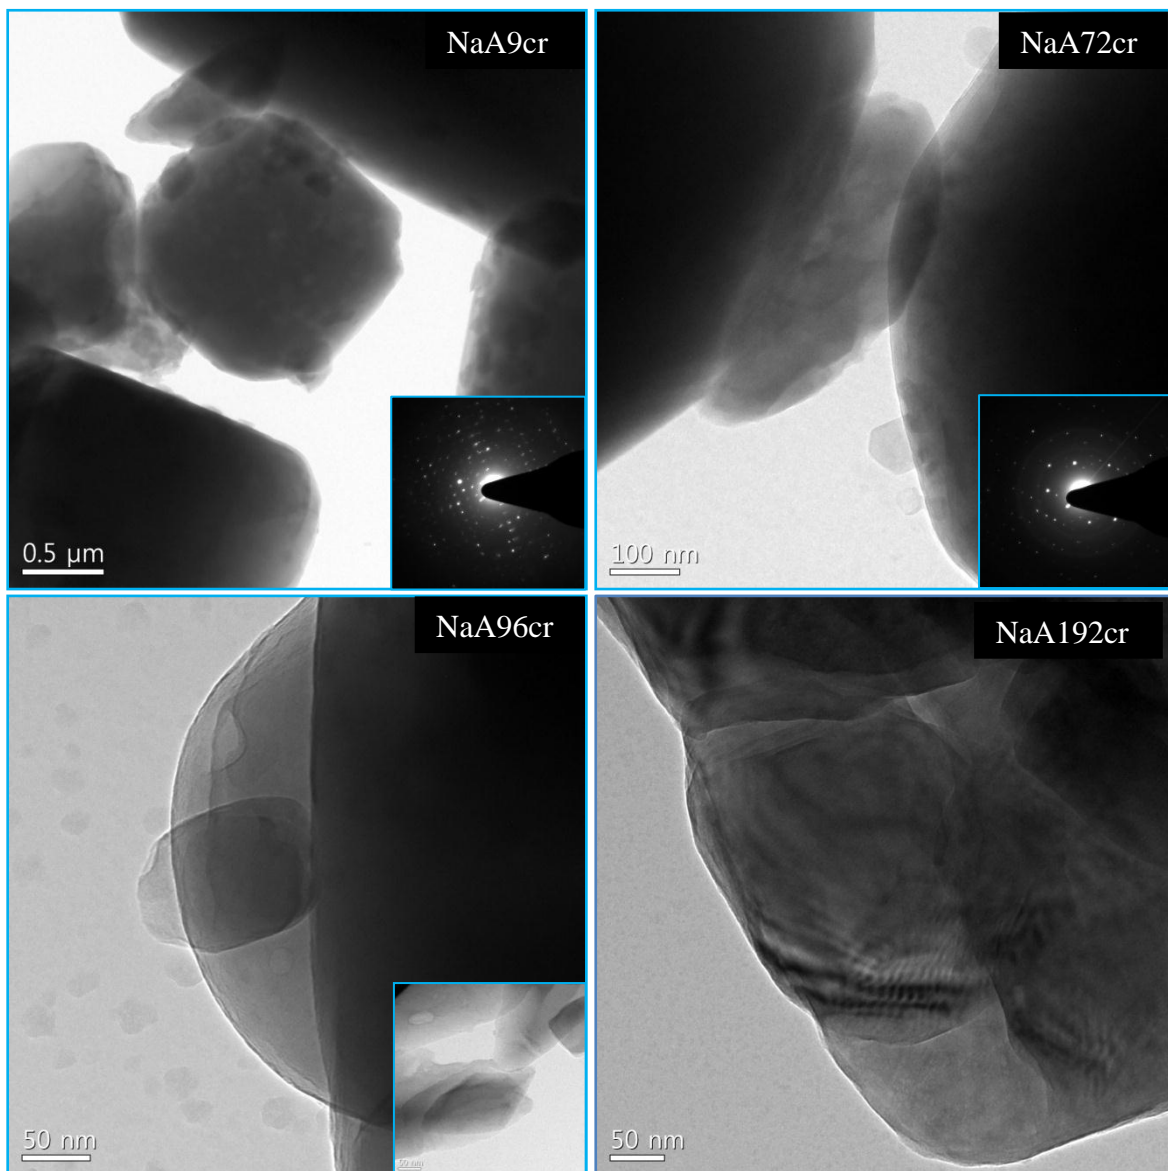



SI7

Physical properties of NaA zeolite crystals obtained from N<sub>2</sub> adsorption/desorption studies.

| Physical parameters                                                                  | NaA1cr | NaA2cr | NaA48cr | NaA192cr |
|--------------------------------------------------------------------------------------|--------|--------|---------|----------|
| BET surface area (m <sup>2</sup> g <sup>-1</sup> )                                   | 15.89  | 1.12   | 0.79    | 1.81     |
| Langmuir surface area (m <sup>2</sup> g <sup>-1</sup> )                              | 23.02  | 0.39   | 1.31    | 2.55     |
| Single point surface area(m <sup>2</sup> g <sup>-1</sup> ) (P/P <sub>0</sub> = 0.10) | 15.04  | 1.28   | 1.05    | 1.79     |
| BET average pore diameter (nm)                                                       | 8.10   | -      | 4.86    | 6.11     |
| BJH adsorption average pore diameter (nm)                                            | 19.37  | 4.60   | 55.17   | 21.71    |
| BJH desorption average pore diameter (nm)                                            | 10.85  | 42.47  | 46.88   | 6.49     |
| <i>t</i> -plot                                                                       |        |        |         |          |
| Total pore volume (cm <sup>3</sup> g <sup>-1</sup> ) (P/P <sub>0</sub> = 0.97)       | 0.032  | -      | 0.001   | 0.003    |
| Mesopore volume (cm <sup>3</sup> g <sup>-1</sup> )                                   | 0.030  | -      | 0.0001  | 0.0027   |
| Micropore area (m <sup>2</sup> g <sup>-1</sup> )                                     | 3.83   | 3.41   | 1.38    | 0.76     |
| External surface area (m <sup>2</sup> g <sup>-1</sup> )                              | 12.06  | -      | -       | 1.05     |
| HK method                                                                            |        |        |         |          |
| Maximum pore volume (cm <sup>3</sup> g <sup>-1</sup> ) (P/P <sub>0</sub> = 0.99)     | 0.059  | 0.001  | 0.002   | 0.005    |
| Median pore diameter (nm)                                                            | 84.13  | 229.36 | 138.98  | 88.64    |
| DA method                                                                            |        |        |         |          |
| Limiting micropore capacity (cm <sup>3</sup> g <sup>-1</sup> S.T.P.)                 | 11.46  | 0.19   | 0.17    | 1.16     |
| Limiting micropore volume (cm <sup>3</sup> g <sup>-1</sup> )                         | 0.018  | 0.0003 | 0.0003  | 0.002    |
| Equivalent surface area (m <sup>2</sup> g <sup>-1</sup> )                            | 24.41  | 0.50   | 0.42    | 2.40     |
| Mean equivalent pore diameter (nm)                                                   | 2.91   | 2.33   | 2.56    | 3.00     |
